# Supplementary material for: Large-Scale Modelling of the Divergent Spectrin Repeats in Nesprins: Giant Modular Proteins
Source: PubMed Central journal article supplement (PMC3646009; doi:10.1371/journal.pone.0063633), 2013-05-06
Supplement: pone.0063633.s005.pdf [file pone.0063633.s005.pdf]

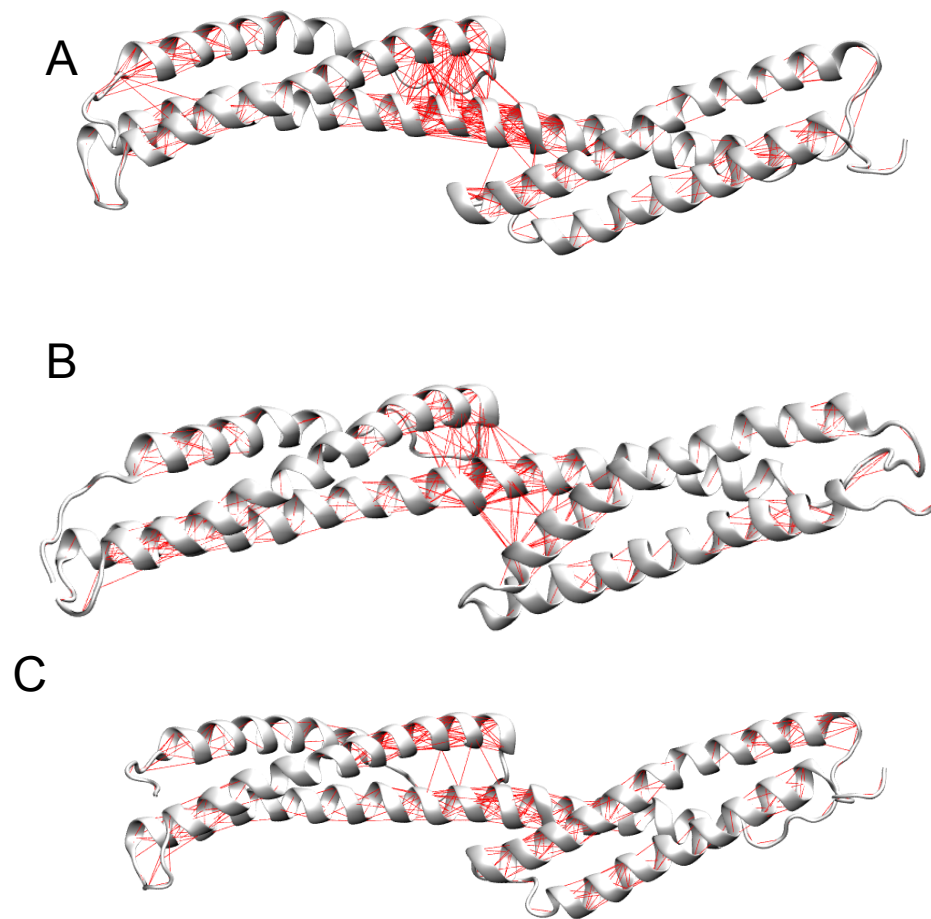

**Figure S5:** Correlated motions of  $\text{Ca}$  residues belonging to 1S35 (A)  $^{\text{NES1}}$ SR70-71 and  $^{\text{NES2}}$ SR52-53 (C). Motions with  $>80\%$  correlation are indicated by lines connecting the involved residues.
