# Supplementary material for: Large-Scale Modelling of the Divergent Spectrin Repeats in Nesprins: Giant Modular Proteins
Source: PubMed Central journal article supplement (PMC3646009; doi:10.1371/journal.pone.0063633), 2013-05-06
Supplement: pone.0063633.s012.pdf [file pone.0063633.s012.pdf]

**Figure S12A:** Alignments used to build the models of nesprin-1 SRs

**A**

```
>P1;NESPRIN-1_SR1
sequence:NESPRIN-1_SR1
-----REDRVIFKEMKVWIEQFERDLT-----RAQMVESNLQDKYQSF
KHFRVQYEMKRKQIEHLLIQPLH-----RDGKLSLDQALVKQSWDRVTSR
LFDWHIQLDKSLPAP*
>P1;3EDV_SR14
structure:3EDV_SR14
SHMRHRLFQLNREVDDLEQWIAEREVVAGSHELGDYEHVTMLQERFREF
ARDTGNIGQERVDTVNHLADELINSGHSDAATIAEWKDGLEAWADLLEL
IDTRTQILAASYELH*

>P1;NESPRIN-1_SR2
sequence:NESPRIN-1_SR2
DWHIQLDKSLPAPLGTIGAWLYRAEVAL-----REEITVQOVHEETANTI
QRKLEQHKDLLQNTDAHKRAFHEIYRTRSVN---GIPVPPDQLEDMAERF
HFVSSTSELHLMKMEFLELK----*
>P1;1QUU_SR3
structure:1QUU_SR3
ETIDQLHLEFAKRAAPFNNWMEGAMEDLQDMFIVHSIEEIQSLITAHEQF
KATLPEADGERQSIMAIQNEVEKVIQSYNIRISSSNPYSTVTMDELRTKW
DKVKQLVPIRDQSLQEELARQHAN*

>P1;NESPRIN-1_SR3
sequence:NESPRIN-1_SR3
--MEFLELKRYRLS--LLVLAESKLSWIKYGR--RESVEQLLQNYVSF
IENSKFFEQYEVTYQILKQTAEMYVKADGSVEEAEN--VMKFMNETTAQW
RNLSVEVRSVRSMLEEVISNWDY*
>P1;1QUU_SR3
structure:1QUU_SR3
ETIDQLHLEFAKRAAPFNNWMEGAMEDLQDMFIVHSIEEIQSLITAHEQF
KATLPEADGERQSIMAIQNEVEKVIQSYNIRISSSNPYSTVTMDELRTKW
DKVKQLVPIRDQSLQEELARQHAN*

>P1;NESPRIN-1_SR4
sequence:NESPRIN-1_SR4
E-VISNWDYGN TVASLQAWLEDAEKMLNQSE-----NAKKDF
FRNLPHWIIQQHTAMNDAGNFLIETCDEMVS RD-----LKOQLLLLNGRW
REL FMEVKQYAQAEMDRMKKEYT*
>P1;1QUU_SR3
structure:1QUU_SR3
ETIDQLHLEFAKRAAPFNNWMEGAMEDLQDMFIVHSIEEIQSLITAHEQF
KATLPEADGERQSIMAIQNEVEKVIQSYNIRISSSNPYSTVTMDELRTKW
DKVKQLVPIRDQSLQEELARQHAN*
```

**Figure S12A:** Alignments used to build the models of nesprin-1 SRs

```
>P1;NESPRIN-1_SR5
sequence:NESPRIN-1_SR5
DEM DRMKKKEYTDCVVTL S AFATEAHKKLSEPLEVS-FMNVKLLIQDLEDI
EQRVPVMDAQYKIITKTAHLITKESPOEEGKEMFATMSKLKEQL
TKVKECYSPLLYESQQLLIPLEELEKQMTSF*
>P1;1QUU_SR3
structure:1QUU_SR3
ETIDQLHLEFAKRAAPFNNWMEGAMEDLQDMFIVHSIEEIQSLITAHEQF
KATLPEADGERQS IMAIQNEVEKVIQSYNIRISSSNPYSTVTMDELRTKW
DKVKQLVPIRDQSLQEELARQHAN-----*
```

  

```
>P1;NESPRIN-1_SR6
sequence:NESPRIN-1_SR6
--PLEELEKQMTSFYDSL GKINEIITVLEREAQSSALFKQKHQELLACQE
NCKKTLTLIEKGSQSVQKFVTL SNVLKHFQTRLQRQIADIHVAFQSMVK
KTGDWKKHVE TNSRL*
>P1;1S35_SR9
structure:1S35_SR9
--GFQEFQKDAKQAEAILSNQEYTLAHLEP-----PDSLEAAEAGIRKFE
DFLGSMENNRDKVLSPVDSGNKLVAEGNLYSDKIKEKVQLIEDRHRKNNE
KAQEASVLLRDN---*
>P1;1U5P_SR15
structure:1U5P_SR15
ANKQONFNTGIKDFDFWLSEVEALLASEDY-----GKDLASVNNLLKKHQ
LLEADISAHEDRLKDLNSQADSLMTSSAFDTSQVKDKRETINGRFQRIKS
MAAARRAKLNESHRL*
```

  

```
>P1;NESPRIN-1_SR7
sequence:NESPRIN-1_SR7
-TNSRLMKKFEESRAELEKVLRIAQEGEGL-----EE-KGDPEELLRRHTEF
FSQL--DQRVLNAFLKACDELTDILPEQEQQGLQE-----AVRKLHKQW
KDLQGEAPYHLLHLKIDVEKNRF-*
>P1;1QUU_SR3
structure:1QUU_SR3
ETIDQLHLEFAKRAAPFNNWMEGAMEDLQDMFIVHSIEEIQSLITAHEQF
KATLPEADGERQS IMAIQNEVEKVIQSYNIRISSSNPYSTVTMDELRTKW
DKVKQLVPIRDQSLQEELARQHAN*
```

**Figure S12A:** Alignments used to build the models of nesprin-1 SRs

```
>P1;NESPRIN-1_SR8
sequence:NESPRIN-1_SR8
----DVEKNRFLASVEECRTELDRETKLM-----QEGSEKIIKEHRVFFSD
KGP HHLCEKRLQLIEELCVKL--PVRDPVRDTPGTCHVTLKELRAAIDST
YRKLME DPK*
>P1;1S35_SR9
structure:1S35_SR9
--GFQEFQKDAKQAEAILSNQEYTLAHLEPPDSLEAAEAGIRKFEDFLGS
MENN RDKVLSPVDSGNKLVAEGLYSDKIKEKVQLIEDRHRKNNEKAQEA
SVLLRDN---*
>P1;1U5P_SR15
structure:1U5P_SR15
ANKQONFNTGIKDFDFWLSEVEALLASEDYGKDLASVNNLLKKHQLLEAD
ISAHEDRLKDLNSQADSLMTSSAFDTSQVKDKRETINGRFORIKSMAAAR
RAKL NESHRL*
```

```
>P1;NESPRIN-1_SR9
sequence:NESPRIN-1_SR9
PDKWKDYTSRFSEFSSWISTNETQLKGIKGEAIDTANHGEVKRAVEEIRN
GVTKRGETLSWLKSRKLVLTEVSSENAQKQGDELAKLSSSFKALVTLLS
EVEKMLSNFGDC*
>P1;1S35_SR9
structure:1S35_SR9
--GFQEFQKDAKQAEAILSNQEYTLAHLEPP--DSLEAAEAGIRKFEDFLG
SMENN RDKVLSPVDSGNKLVAEG--NLYSDKIKEKVQLIEDRHRKNNEKAQ
EASVLLRDN---*
>P1;1U5P_SR15
structure:1U5P_SR15
ANKQONFNTGIKDFDFWLSEVEALLASEDYG--KDLASVNNLLKKHQLLEA
DISAHEDRLKDLNSQADSLMTSS--AFDTSQVKDKRETINGRFORIKSMAA
ARRAKL NESHRL*
```

```
>P1;NESPRIN-1_SR10
sequence:NESPRIN-1_SR10
ELISGSKEVQ---EQA EKILDTE----NLF EAQQLLHHQOKTKRISAKK
RDVQQQIAQAQQEGG---LPDRGHEELRKLESTLDGLERSRERQERRIQ
VTL*
>P1;3EDV_SR16
structure:3EDV_SR16
RFFSMVRDMLWMEDVIRQIEAQEKPRDVSSVELLMNNHQGIKAEIDARN
DSFTTCIELGKSL LARKHYASEEIKEKLLQLTEKRKEMIDKWEDRWELR
L---*
```

**Figure S12A:** Alignments used to build the models of nesprin-1 SRs

```
>P1;NESPRIN-1_SR11
sequence:NESPRIN-1_SR11
QVTLRKWERFETNKETVVRYLFTGTGSSHERFLSFSSLESLSSELEQTKEF
SKRTEsIAVQAE NLVKEASEI-----PLGPNKQLLQQOAKSIKEQVKK
LEDTLEEDIKTMEMVKTKWDHF-----*
>P1;1QUU_SR3
structure:1QUU_SR3
ETIDQLHLEFAKRAAPFNNWMEGAMEDLQDMFIVHSIEEIQSLITAHEQF
KATLPEADGERQSIMAIQNEV-----EKVIQSYNIRISSSNPYSTVTMD
ELRTKWDKVKQLVPIRDQSLQEELARQHAN*

>P1;NESPRIN-1_SR12
sequence:NESPRIN-1_SR12
KTKWDHFGSNFETLSVWITEKEKELNALE--TSSSAMDMQISQIKVTIQE
IESKLSsIVGLEEEAQsFAQFVTTGESARIKAKLTQIRRYGEELREHAQC
LEGTILGHL--*
>P1;1S35_SR9
structure:1S35_SR9
--GFQEFQKDAKQAEAILSNQEYTLAHL EPPDSLEAAEAGIRKFEDFLGS
MENN RDKVLSPVDSGNKLVAEGNL-YSDKIKEKVQLIEDRHRKNNEKAQE
ASVLLRDN---*
>P1;1U5P_SR15
structure:1U5P_SR15
ANKQONFNTGIKDFDFWLSEVEALLASEDYGKDLASVNNLLKKHQLEAD
ISAHEDRLKDLNSQADSLMTSSAF-DTSQVKDKRETINGRFORIKSMAAA
RRAKL NESHRL*

>P1;NESPRIN-1_SR13
sequence:NESPRIN-1_SR13
LSQQQKFEENLRKIQQSVSEFEDKLAVPIKICSSATETYKVLQEHMDLCQ
ALESLSSAITAFSASARKVVN-----RDSCVQEAAALQQOYEDILRRAKE
RQTAL ENL*
>P1;1S35_SR9
structure:1S35_SR9
--GFQEFQKDAKQAEAILSNQEYTLAHL-EPPDSLEAAEAGIRKFEDFLG
SMENN RDKVLSPVDSGNKLVAEGNLYSDKIKEKVQLIEDRHRKNNEKAQE
ASVLLRDN*
```

**Figure S12A:** Alignments used to build the models of nesprin-1 SRs

```
>P1;NESPRIN-1_SR14
sequence:NESPRIN-1_SR14
LAHWQRLEKELSSFLTWLERGEAKASSPEMDISADRVKVEGELQLIQALQ
NEVVSQASFYSKLLQLKESLFSVASKDDVKMMKLHLEQLDERWRDLPQII
NKRINFLQSVVAE*
>P1;1S35_SR9
structure:1S35_SR9
--GFQEFQKDAKQAEAILSNOEYTLAHLE--PPDSLEAAEAGIRKFEDFL
GSMENNRDKVLSPVDSGNKLVAEG-NLYSDKIKEKQVQLIEDRHRKNNEKA
QEASVLLRDN---*
>P1;1U5P_SR15
structure:1U5P_SR15
ANKQONFNTGIKDFDFWLSEVEALLASED--YGKDLASVNNLLKKHQLLE
ADISAHEDRLKDLNSQADSLMTSS-AFDTSQVKDKRETINGRFQRIKSMA
AARRAKLNESHRL*

>P1;NESPRIN-1_SR15
sequence:NESPRIN-1_SR15
VAEHQQFDELLLSFSVWIKLFLSELQTTT-EISIMDHQVALTRHKDHAAE
VESKKGELQSLQGHAKLGLSLGRAEDLHLLQGAEDCFQLFEEASQVVER
RQLALSHLAEF*
>P1;1S35_SR9
structure:1S35_SR9
--GFQEFQKDAKQAEAILSNOEYTLAHLEPPDSLEAAEAGIRKFEDFLGS
MENNRDKVLSPVDSGNKLVAEGNLYSDKIKE-KVQLIEDRHRKNNEKAQE
ASVLLRDN---*
>P1;1U5P_SR15
structure:1U5P_SR15
ANKQONFNTGIKDFDFWLSEVEALLASEDYGKDLASVNNLLKKHQLLEAD
ISAHEDRLKDLNSQADSLMTSSAFDTSQVKD-KRETINGRFQRIKSMAAA
RRAKLNESHRL*

>P1;NESPRIN-1_SR16
sequence:NESPRIN-1_SR16
-----LSGILRQLRQTVEATNSMKNESDLIEKDLNDALQNAKALESAAV
SLDGILSKAQYHLKIGSSEQRT---SCRATADQLCGEVERIQNLLGTKQS
EADALAVL---*
>P1;1S35_SR9
structure:1S35_SR9
---GFQEFQKDAKQAEAILSNOEYTLAHLEPPDSLEAAEAGIRKFEDFLG
SMENNRDKVLSPVDSGNKLVAEGNLYSDKIKEKQVQLIEDRHRKNNEKAQE
ASVLLRDN---*
>P1;1U5P_SR15
structure:1U5P_SR15
-ANKQONFNTGIKDFDFWLSEVEALLASEDYGKDLASVNNLLKKHQLLEA
DISAHEDRLKDLNSQADSLMTSSAFDTSQVKDKRETINGRFQRIKSMAAA
RRAKLNESHRL*
```

**Figure S12A:** Alignments used to build the models of nesprin-1 SRs

```
>P1;NESPRIN-1_SR17
sequence:NESPRIN-1_SR17
AVLKKAFQDQKEELLKSIEDIEERTDKERLKEPTRQALQQLRVFNQLED
ELNSHEHELKWLKDKAKQIAQKDVAFAPVDREINRLEVTWDDTKRLIHE
NQGQ-----*
>P1;1S35_SR9
structure:1S35_SR9
--GFQEFQKDAKQAEAILSNOEYTLAHLEPPD-SLEAAEAGIRKFEDFLG
SMENNRDKVLSPVDSGNKLVAEGNLYSDKIKEKVQLIEDRHRKNNEKAQE
ASVLLRDN---*
>P1;1U5P_SR15
structure:1U5P_SR15
ANKQONFNTGIKDFDFWLSEVEALLASEDYGK-DLASVNLLKKHOLLEA
DISAHEDRLKDLNSQADSLMTSSAFDTSQVKDKRETINGRFRQIKSMAAA
RRAKLNESHRL*

>P1;NESPRIN-1_SR18
sequence:NESPRIN-1_SR18
CGLIDL MREYQNLKSAVSKVLENASSVIVTRTTIKDQEDLKWAFSKHETA
KNKMNYKQKDLDNFTSKGKHLSELKKIHSSDFSLVKTD MESTV DKLVDV
SEKLEENMDRLRVSLSIW-*
>P1;1HCI_SR4
structure:1HCI_SR4
HANERLRRQFAAQANAIGPWIQNKMEEIARSS-IQITGALEDQMNQLKQY
EHNIINYKNNIDKLEGDHQLIQEALV----FDNKHTNYTMEHIRV GWELL
LTTIARTINEVETQILTRD*

>P1;NESPRIN-1_SR19
sequence:NESPRIN-1_SR19
LSIWDDVLSTRDEIEGWSNNCVPQMAENI--SNLDNHLRAEELLKEFESE
VKNKALRLEELHSKVNDLKELTKNLETPPD LQFIEADLMQKLEHAK EITE
VAKGTLKDFTAQ*
>P1;1S35_SR9
structure:1S35_SR9
--GFQEFQKDAKQAEAILSNOEYTLAHLEPPDSLEAAEAGIRKFEDFLGS
MENNRDKVLSPVDSGNKLVAEGNLYS--DKIKEKVQLIEDRHRKNNEKAQ
EASVLLRDN---*
>P1;1U5P_SR15
structure:1U5P_SR15
ANKQONFNTGIKDFDFWLSEVEALLASEDYGKDLASVNLLKKHOLLEAD
ISAHEDRLKDLNSQADSLMTSSAFDT--SQVKDKRETINGRFRQIKSMAA
ARRAKLNESHRL*
```

**Figure S12A:** Alignments used to build the models of nesprin-1 SRs

```
>P1;NESPRIN-1_SR20
sequence:NESPRIN-1_SR20
TAQSTQVEKFINDDITWFTKVEESLMN----CAQNETCEALKKVKDIQKE
LQSQQSNISSTQENLNSLCRKYHSAELES LGRAMTGLIKKHEAVSQLCSK
TQASLQESLEK*
>P1;1S35_SR9
structure:1S35_SR9
--GFQEFQKDAKQAEAILSNOEYTLAHLEPPDSLEAAEAGIRKFEDFLGS
MENNDRKVLSPVDSGNKLVAE-GNLYSDKIKEKVQLIEDRHRKNNKAQE
ASVLLRDN---*
>P1;1U5P_SR15
structure:1U5P_SR15
ANKQONFNTGIKDFDFWLSEVEALLASEDYGKDLASVNNLLKKHQLLEAD
ISAHEDRLKDLNSQADSLMTS-SAFDTSQVKDKRETINGRFORIKSMAAA
RRAKLNESHRL*
```

  

```
>P1;NESPRIN-1_SR21
sequence:NESPRIN-1_SR21
SLQESLEKHFSESMQEFQEWFLGAKAAAKESSDRTGDSKVLEAKLHDLQN
ILDSVSDGQSKLDAVTQEGQTLTYAHLKQIVSSIQEQITKANEEFQAFK
QCLKDKQALQDCASELG*
>P1;1HCI_SR4
structure:1HCI_SR4
HANERLRRQFAAQANAIGPWIQNKMEEIARSS--IQITGALEDQMNQLKQ
YEHNIIINYKNNIDKLEGDHQLIQEAL-VFDNKHTNYTMEHIRVGVWELLLT
TIARTINEVETQILTRD*
```

  

```
>P1;NESPRIN-1_SR22
sequence:NESPRIN-1_SR22
ASELGSFEDQHRKLNLIWIHEMEERFNTENLGESKQHIPEKKNEVHKVEMF
LGELLAARES LDKLSQRGQLLSEEGH-GAGQEGRLCSQLLTS HQNLLRMT
KEKLRSCQVALQEH*
>P1;1S35_SR9
structure:1S35_SR9
--GFQEFQKDAKQAEAILSNOEYTLAHLEPPDS---LEAAEAGIRKFEDF
LGSMEENNDRKVLSPVDSGNKLVAEGNLYSDKIKEKVQLIEDRHRKNNKA
QEASVLLRDN----*
```

  

```
>P1;NESPRIN-1_SR23
sequence:NESPRIN-1_SR23
QVALQEHEALEEALQSMFWVKAIQDRLACAESTLGSKDTLEKRLSQIQD
ILLMKGEGEVKLNMAIGKGEQALRSSNKEGQRV-----IQTOLET LKEV
WADIMSSSVHAQSTLESVISQWNDY*
>P1;1QUU_SR3
structure:1QUU_SR3
ETIDQLHLEFAKRAAPFNWMEGAMEDLQDMFIVH-SIEEIQSLITAHEQ
FKATLPEADGERQSIMAIQNEVEKVIQSYNIRISSNPYSTVTMDELRTK
WDKVKQLVPIRDQSLQEELARQHAN*
```

**Figure S12A:** Alignments used to build the models of nesprin-1 SRs

```
>P1;NESPRIN-1_SR24
sequence:NESPRIN-1_SR24
IISQWNDYVERKNQLEQWMESVDQKIEHPLQPQPGLKEKFVLLDHLQSI LS
EAEDHTRALHRLIAKSRELYEKTE-DESFKDTAQEELKTQFNDIMTVAKE
KMRKVVEEIVKD*
>P1;1S35_SR9
structure:1S35_SR9
--GFQEFQKDAKQAEAILSNOEYTLAH-LEPPDSLEAAEAGIRKFFEDFLG
SMENNRDKVLSVPVDSGNKLVAEAGNLYSDKIKEKVQLIEDRHRKNNEKAQE
ASVLLRDN---*
>P1;1U5P_SR15
structure:1U5P_SR15
ANKQONFNTGIKDFDFWLSEVEALLAS-EDYGKDLASVNNLLKHKHQLLEA
DISAHEDRLKDLNSQADSLMTSSAFDTSQVKDKRETINGRFQRIKSMAAA
RRAKLNESHRL*

>P1;NESPRIN-1_SR25
sequence:NESPRIN-1_SR25
VKDHLMYLDAVHEFTDWLHSAKEELHRWSDMSGDSSATQKKLSKIKELID
SREIGASRLSRVESLAPEVKQNTTASGCELMHTEMQALRADWKQWEDSVF
QTQSC-----*
>P1;1S35_SR9
structure:1S35_SR9
--GFQEFQKDAKQAEAILSNOEYTLAHL-EPPDSLEAAEAGIRKFFEDFLG
SMENNRDKVLSVPVDSGNKLVAE-GNLYSDKIKEKVQLIEDRHRKNNEKAQ
EASVLLRDN---*
>P1;1U5P_SR15
structure:1U5P_SR15
ANKQONFNTGIKDFDFWLSEVEALLASE-DYGKDLASVNNLLKHKHQLLEA
DISAHEDRLKDLNSQADSLMTS-SAFDTSQVKDKRETINGRFQRIKSMAA
ARRAKLNESHRL*

>P1;NESPRIN-1_SR26
sequence:NESPRIN-1_SR26
---AQLEQALEQFSALLKTWAQQLTLLEGKNTDEE---IVECWHKQOEIL
DALQKAEPRTEDLKSQNLNLCRFSRDLSTYSG-KVSGLIKEYNCLCLQAS
KGCQNKQEQILQQRF*
>P1;1HCI_SR4
structure:1HCI_SR4
HANERLRRQFAAQANAIGPWIQNKMEEIARSSIQITGALEDQMNQLKQYE
HNIINYKNNIDKLEGDHQLIQEALVFDNKHTNYTMEHIRVGVWELLTTIA
RTINEVETQILTRD*
```



**Figure S12A:** Alignments used to build the models of nesprin-1 SRs

```
>P1;NESPRIN-1_SR27
sequence:NESPRIN-1_SR27
QILQORFRKAFRDFQOWLVAKITTTAKCFDIPQNISEVSTSLQKIQEFLS
ESENGQHKLNMMLSKGELLSTLLTKEKAKGIQAKVTAAKEDWKNFHSNLH
QKESALENLKIQ*
>P1;1S35_SR9
structure:1S35_SR9
--GFQEFQKDAKQAEAILSNOEYTLAHL-EPPDSLEAAEAGIRKFEDFLG
SMENNRDKVLSPVDSGNKLVAE-GNLYSDKIKEKVQLIEDRHRKNNEKAQ
EASVLLRDN---*
>P1;1U5P_SR15
structure:1U5P_SR15
ANKQONFNTGIKDFDFWLSEVEALLASE-DYGKDLASVNNLLKKHOLLEA
DISAHEDRLKDLNSQADSLMTS-SAFDTSQVKDKRETINGRFORIKSMAA
ARRAKLNESHRL*
```

```
>P1;NESPRIN-1_SR28
sequence:NESPRIN-1_SR28
KIQMKDFEVSAPPIQDWLSKTEKMHVHSSNRLYDLPKRREQQKLSVLE
EIHICYEPQLNRLKEKAQQQLWEG-QAASKSFRHRVSQLSSOYLALSNTKE
KVSRLDRI*
>P1;1S35_SR9
structure:1S35_SR9
--GFQEFQKDAKQAEAILSNOEYTLAHL-EPPDS-LEAAEAGIRKFEDFLG
SMENNRDKVLSPVDSGNKLVAE-GNLYSDKIKEKVQLIEDRHRKNNEKAQE
ASVLLRDN*
```

```
>P1;NESPRIN-1_SR29
sequence:NESPRIN-1_SR29
DRIVAEHNQFSLGIKELQDWMTDIAIHMLDSYCHPTSDKSVLDSRTLKLEA
LLSVKQEKEIQMKMIVTRGESVLQNTSPEGIPT-----IQQLQSVKDM
WASLLSAGIRCKSQLEGALSKWTSY*
>P1;1QUU_SR3
structure:1QUU_SR3
ETIDQLHLEFAKRAAPFNNWMEGAMEDLQDMFIVH-SIEEIQSLITAHEQ
FKATLPEADGERQSIMAIQNEVEKVIQSYNIRISSNPYSTVTMDELRTK
WDKVKQLVPIRDQSLQEELARQHAN*
```

**Figure S12A:** Alignments used to build the models of nesprin-1 SRs

```
>P1;NESPRIN-1_SR30
sequence:NESPRIN-1_SR30
LSKWTSYQDGVRQFSGWMDSMEANLNESERQHAELRDKTTMLGKAKLLNE
EVLSYSSLLETIEVKGAGMTE-----HYVTQLELQDLQERYRAIQERAKE
AVTKSEKLVRL*
>P1;1S35_SR9
structure:1S35_SR9
--GFQEFQKDAKQAEAILSNOEYTLA-HLEPPDSLEAAEAGIRKFFEDFLG
SMENNRDKVLSPVDSGNKLVAEAGNLYSDKIKEKVQLIEDRHRKNNEKAQE
ASVLLRDN---*
>P1;1U5P_SR15
structure:1U5P_SR15
ANKQONFNTGIKDFDFWLSEVEALLA-SEDYGKDLASVNNLLKKHOLLEA
DISAHEDRLKDLNSQADSLMTSSAFDTSQVKDKRETINGRFORIKSMAAA
RRAKLNESHRL*

>P1;NESPRIN-1_SR31
sequence:NESPRIN-1_SR31
VRLHQEYQRDLKAFEVWLQEQEKLQYSVLEGDAHTHETTLDLQELQV
HCAEQALLNSVLHTREDVIPSG--IPQAEDRALESRLQDWQAYQHRLSE
TRTQFNNV*
>P1;1S35_SR9
structure:1S35_SR9
--GFQEFQKDAKQAEAILSNOEYTLAHLAEP-PDSLEAAEAGIRKFFEDFLG
SMENNRDKVLSPVDSGNKLVAEAGNLYSDKIKEKVQLIEDRHRKNNEKAQE
ASVLLRDN*

>P1;NESPRIN-1_SR32
sequence:NESPRIN-1_SR32
NNVVNKLRL-MEQKFQOVDEWLKTAEEKVSPRTRRQSNRATKEIQLHQMK
KWHEEVTAYRDEVEEVGARAQEILDESHVNSR-----MGCQATQLTS
RYQALLLQVLEQIKFLEEEIQSLEES*
>P1;1QUU_SR3
structure:1QUU_SR3
-ETIDQLHLEFAKRAAPFNWMEGAMEDLQ-DMFIVHSIEEIQSLITAHE
QFKATLPEADGERQSIMAIQNEVEKVIQSYNIRISSNPYSTVTMDELRT
KWDKVKQLVPIRDQSLQEELARQHAN*

>P1;NESPRIN-1_SR33
sequence:NESPRIN-1_SR33
-----YGSTHKNFKNVATKIDKVDTVMMGKLLKTLEVLLKDMEKGHS
LLKSAREKGERAVKYLEEGEAERL-----RKEIHDHMEQLKELTSTVR
KEHMTLEKGLHLAKEFSD*
>P1;3EDV_SR14
structure:3EDV_SR14
-SHMRHRLFQLNREVDLDLEQWIAEREVVAGSHELQDYEHVTMLQERFRE
FARDTGNIQERVDTVN-HLADELINSGHSDAATIAEWKDGLNEAWADLL
ELIDTRTQILAASYELH-*
```

**Figure S12A:** Alignments used to build the models of nesprin-1 SRs

```
>P1;NESPRIN-1_SR34
sequence:NESPRIN-1_SR34
LHLAKEFSDKCKALTQWIAEYQEILHVPEEPKMELYEKKAQLSKYKSLQQ
TVLSHEPSVKSREKGEALLEL--VQDVTLKDKIDQLQSDYQDLCSIGKE
HVFSLEAK*
>P1;1S35_SR9
structure:1S35_SR9
--GFQEFQKDAKQAEAILSNOEYTLAHL--PPDSLEAAEAGIRKFEDFLG
SMENNRDKVLSPVDSGNKLVAEGNLYSDKIKEKVQLIEDRHRKNNEKAQE
ASVLLRDN*

>P1;NESPRIN-1_SR35
sequence:NESPRIN-1_SR35
VKDHEDYNSELQEVKWLQMSGRLVAPDLETSLETITQQLAHHKAMM
EEIAGFEDRLNNLQMGDTLIGOCADHLQAKLKQNVHAHLQGTKDSYSAI
CSTAQRMYQSLEHE*
>P1;1S35_SR9
structure:1S35_SR9
--GFQEFQKDAKQAEAILSNOEYTLAHL--EPPDSLEAAEAGIRKFEDFL
GSMENNRDKVLSPVDSGNKLVAEGNLY-----SDKIKEKVQLIEDRHRKN
NEKAQEASVLLRDN*

>P1;NESPRIN-1_SR36
sequence:NESPRIN-1_SR36
QSLEHELQKHVSRQDTLQOCQAWLSAVQPDLEPSPQPPLSRAEAIKQVKH
FRALQEQARTYLDLLCSMCDLSNASVKTTAKDIQQTEQTIEQKLVQAQNL
TQGWEEIKHLKSELWIYLDADQQLQNM*
>P1;1QUU_SR3
structure:1QUU_SR3
ETIDQ-LHLE--FAKRAAPFNWMEGAMEDLQ-DMFIVHSIEEIQSLITA
HEQFKATLPEADGERQSIMAIQNEVEKVIQSYNIRISSNPYSTVTMDEL
RTKWDKVKQLVPIRDQSLQEELARQHAN*

>P1;NESPRIN-1_SR37
sequence:NESPRIN-1_SR37
-----SELWIYLDADQQLQNMKRRHSE-LE-----LNIAQNMVS
QVKDFV-----KKLQSKQASVNTIIEKVNKLTKKEES---P-EHKEINHL
NDQWLDLCRQSNNLCLQREEDLQRTDYH*
>P1;1HCI_SR1
structure:1HCI_SR1
SSAVNQENERLMEEYERLASELLEWIRRTIPWLENRTPEKTMQAMQKLE
DFRDYRRKHKPPKVQEKQLEINFNTLQTKLRISNRPAFMPSEGKMVSDI
AGAWQRLQAEKGYEEWLLNEIRRL-----*
```

**Figure S12A:** Alignments used to build the models of nesprin-1 SRs

```
>P1;NESPRIN-1_SR38
sequence:NESPRIN-1_SR38
---LQTRDYHDCMNVVEVFLEKFTTEWDNLARSDAESTAVHLEALKKLA
LALQERKYAIEDLKDQKQKMIEHLNLDKELVKEQTSHLEQRWFQLEDLI
KRKIQVSVTNLEELNVVQS*
>P1;1HCI_SR4
structure:1HCI_SR4
HANERLRRQFAAQANAIGPWIQNKMEEIARSSIQITGALEDQMNQLKOYE
HNIINYKNNIDKLEGDHQLIQEALVF-DNKHTNYTMEHIRVGVWELLLTTI
ARTINEVETQILTRD----*

>P1;NESPRIN-1_SR39
sequence:NESPRIN-1_SR39
VTNLEELNV-VQSRFQELMEWAEEOQPNTAEALKQSPPPDMAQNLLMDHL
AICSELEAKQMLLKSLLKADRVMDLGLNERQVIQKALSDAQSHVNCLS
DLVGQRRKYLKALSEKTQF-----*
>P1;1QUU_SR3
structure:1QUU_SR3
-ETIDQLHLEFAKRAAPFNWMEGAMEDLQDMFIVH-SIEEIQSLITAHE
QFKATLPEADGERQSIMAIQNEVEKVIQSYNIRISSNPYSTVTMDELRT
KWDKVKQLVPIRDQSLQEELARQHAN*

>P1;NESPRIN-1_SR40
sequence:NESPRIN-1_SR40
LSEKTQFLMAVFQATSQIQQHERKIMFREHICLLPDDVSKQVKTCKSAQA
SLKTYQNEVTGLWAQGRELMKEVTEQEKSEVLGKLOELQSVYDSVLQKCS
HRLQELEKNLVS*
>P1;1S35_SR9
structure:1S35_SR9
--GFQEFQKDAKQAEAILSNQEYTLAHLE-PPDSLEAAEAGIRKFFEDFLG
SMENNRDKVLSPVDSGNKLVAE-GNLYSDKIKEKVQLIEDRHRKNNEKAQ
EASVLLRDN---*
>P1;1U5P_SR15
structure:1U5P_SR15
ANKQQNFNTGIKDFDFWLSEVEALLASED-YGKDLASVNNLLKKHQLLEA
DISAHEDRLKDLNSQADSLMTS-SAFDTSQVKDKRETINGRFORIKSMAA
ARRAKLNESHRL*
```

**Figure S12A:** Alignments used to build the models of nesprin-1 SRs

```
>P1;NESPRIN-1_SR41
sequence:NESPRIN-1_SR41
LVSRKHFKEDFDKACHWLKQADIVTFPEINLMNESTELHTQLAKYQNILE
QSPEYENLLLLTLQRTGQTILPSLNEVDHSYLSEKLNALPRQFNVIVALAK
DKFYKVVQEAILA*
>P1;1S35_SR9
structure:1S35_SR9
--GFQEFQKDAKQAEAILSNOEYTLAHL-EPPDSLEAAEAGIRKFFEDFLG
SMENNRDKVLSPVDSGNKLVAE-GNLYSDKIKEKVQLIEDRHRKNNEKAQ
EASVLLRDN---*
>P1;1U5P_SR15
structure:1U5P_SR15
ANKQONFNTGIKDFDFWLSEVEALLASE-DYGKDLASVNNLLKKHQLLEA
DISAHEDRLKDLNSQADSLMTS-SAFDTSQVKDKRETINGRFORIKSMAA
ARRAKLNESHRL*

>P1;NESPRIN-1_SR42
sequence:NESPRIN-1_SR42
ILARKEYASLIELTTOQLSELEAQFLRMSKVPTDLAVEEALSLQDGCRAI
LDEVAGLGEAVDELNQKKEGFRSTG---QPWQPKMLHLVTLYHRLKRQT
EQRVSLLEDIT*
>P1;1S35_SR9
structure:1S35_SR9
--GFQEFQKDAKQAEAILSNOEYTLAHLPEP---PDSLEAAEAGIRKFFEDF
LGSMENNRDKVLSPVDSGNKLVAEAGNLYSDKIKEKVQLIEDRHRKNNEKA
QEASVLLRDN*

>P1;NESPRIN-1_SR43
sequence:NESPRIN-1_SR43
TSAYQEHEKMCQQLERQLKSVKEEQSK--VNEETLPAAEKLKMYHSLAGS
LQDSGIVLKRVTIHLEDLAPHLDPAYEKARHQIQSWQGELKLLTSAIGE
TVTECESRMVQSIDF*
>P1;1S35_SR9
structure:1S35_SR9
G--GFQEFQKDAKQAEAILSNOEYTLAHLPEPPDSLEAAEAGIRKFFEDFLGS
MENNRDKVLSPVDSGNKL-----VAEGNLYSDKIKEKVQLIEDRHRKNNE
KAQEASVLLRDN---*
>P1;1U5P_SR15
structure:1U5P_SR15
ANKQONFNTGIKDFDFWLSEVEALLASEDYGKDLASVNNLLKKHQLLEAD
ISAHEDRLKDLNSQADSL-----MTSSAFDTSQVKDKRETINGRFORIKS
MAAARRAKLNESHRL*
```

**Figure S12A:** Alignments used to build the models of nesprin-1 SRs

```
>P1;NESPRIN-1_SR44
sequence:NESPRIN-1_SR44
MVQSIDFQTEMSRSLDWLRRVKAELSGPVYLDLNLQDIQEEIRKIQIHQE
EVQSSLRIMNALSHKEKEKFTKAKELISADLEHSLAELSELGDGDIQEALR
TRQATLTEIYSQ*
>P1;1S35_SR9
structure:1S35_SR9
--GFQEFQKDAKQAEAILSNOEYTLAHLEPPD-SLEAAEAGIRKFEDFLG
SMENNRDKVLSPVDSG-NKLVAEGNLYSDKIKEKVQLIEDRHRKNNEKAQ
EASVLLRDN---*
>P1;1U5P_SR15
structure:1U5P_SR15
ANKQONFNTGIKDFDFWLSEVEALLASEDYGK-DLASVNNLLKKHOLLEA
DISAHEDRLKDLNSQA-DSLMTSSAFDTSQVKDKRETINGRFORIKSMAA
ARRAKLNESHRL*
```

```
>P1;NESPRIN-1_SR45
sequence:NESPRIN-1_SR45
YSQCQRYQVVFQAANDWLEDAQEMLQLAGNGLDVESAEENLKSHMEFFST
EDQFHSNLEELHSLVATLDPLIKPTGKEDLEQKVASLELRSQMSRDSGA
QVDLLQRC*
>P1;1S35_SR9
structure:1S35_SR9
--GFQEFQKDAKQAEAILSNOEYTLAHLEPPDSLEAAEAGIRKFEDFLGS
MENNRDKVLSPVDSGNKLVAE-GNLYSDKIKEKVQLIEDRHRKNNEKAQE
ASVLLRDN*
```

```
>P1;NESPRIN-1_SR46
sequence:NESPRIN-1_SR46
TAQWHDYQKAREEVIELMNDTEKKLSEFSLKTSSEAEKLESEHKALV
SVVNSFHEKIVALEEKASQLEKTGNDASKATLSRSMTTVWQRWTRLRAVA
QDQEKILEDA*
>P1;1S35_SR9
structure:1S35_SR9
--GFQEFQKDAKQAEAILSNOEYTLAHLEPPDS--LEAAEAGIRKFEDFL
GSMENNRDKVLSPVDSGNKLVAE-GNLYSDKIKEKVQLIEDRHRKNNEKA
QEASVLLRDN*
```

**Figure S12A:** Alignments used to build the models of nesprin-1 SRs

```
>P1;NESPRIN-1_SR47
sequence:NESPRIN-1_SR47
VDEWTFGNKVKKATEMIDQLQDKLPGSSAEKASKAELLTLLEYHDTFVL
ELEQQQSALGMLRQQTLSMLQDGAAPTPEEPPLMQEITAMQDRCLNMQE
KVKTNGKLVKQELKDREMV*
>P1;1S35_SR9
structure:1S35_SR9
--GFQEFQKDAKQAEAILSNOEYTL-AHLEPPDSLEAAEAGIRKFEDFLG
SMENNRDKVLSPVDSGNKLVAEAGNL-----YSDKIKEKVQLIEDRHR
KNNEKAQEASVLLRDN---*
>P1;1U5P_SR15
structure:1U5P_SR15
ANKQONFNTGIKDFDFWLSEVEALL-ASEDYGKDLASVNNLLKKHQLLEA
DISAHEDRLKDLNSQADSLMTSSAF-----DTSQVKDKRETINGRFQ
RIKSMAAARRAKLNESHRL*
```

```
>P1;NESPRIN-1_SR48
sequence:NESPRIN-1_SR48
KQELKDREMVETQINSVKCWVQETKEYLGNPTIE----IDAQLEELQILL
TEATNHRQNIKMAEEQKEKYLGLYTILP-SELSLQLAEVALDLKIRDQI
QDKIKEVEQSKATSQ*
>P1;1HCI_SR4
structure:1HCI_SR4
HANERLRRQFAAQANAIGPWIQNKMEEIARSSIQITGALEDQMNQLKQYE
HNIINYKNNIDKLEGDHQLIQEALVFDNKHTNYTMEHIRVIGWE-LLLTII
ARTINEVETQILTRD*
```

```
>P1;NESPRIN-1_SR49
sequence:NESPRIN-1_SR49
ATSQELSRQIQKLAKDLTT-ILTKLKAKTDNVVQAKTDQKVLGEELDGCN
SKLMELDAAVQKFLEQNGQLGKPLA--KK-----IGKLTTELHQQTIRQAE
NRLSKLNQAASHLE*
>P1;1HCI_SR4
structure:1HCI_SR4
HANERLRRQFAAQANAIGPWIQNKMEEIARSSIQITGALEDQMNQLKQYE
HNIINYKNNIDKLEGDHQLIQEALVFDNKHTNYTMEHIRVIGWELLLTTIA
RTINEVETQILTRD*
```

```
>P1;NESPRIN-1_SR50
sequence:NESPRIN-1_SR50
NQAASHLEEYNEMLELILKWKIEKAKVLAHGTTIAWNSASQLREQYILHQT
LEESKEIDSELEAMTEKLQYLTSVYCTEK--MSQQVAELGRETEELRQMI
KIRLQNLQDAAKDMK*
>P1;1HCI_SR4
structure:1HCI_SR4
HANERLRRQFAAQANAIGPWIQNKMEEIAR-SSIQITGALEDQMNQLKQY
EHNIINYKNNIDKLEGDHQLIQEALVFDNKHTNYTMEHIRVIGWELLLTTI
ARTINEVETQILTRD*
```

**Figure S12A:** Alignments used to build the models of nesprin-1 SRs

```
>P1;NESPRIN-1_SR51
sequence:NESPRIN-1_SR51
AKDMKKFEAELKKLQAALEQAQATLTSPEVG--RLSLKEQLSHRQHLLSE
MESLKPVKVQAVQLCQSALRIPEDVVASLPLCHAALRLQEEASRLQHTAIQ
QCNIMQEA*
>P1;1S35_SR9
structure:1S35_SR9
--GFQEFQKDAKQAEAILSNOEYTLAHLEPPDSLEAAEAGIRKFEDFLGS
MENNDRKVLSPVDSGNKLVAEENLYSD-KIKEKVQLIEDRHRKNNEKAQE
ASVLLRDN*

>P1;NESPRIN-1_SR53
sequence:NESPRIN-1_SR53
LERQOKYQDSLQSIKMEAIELKLSSESP--EPGRSPESQMAEHQALMDE
ILMLQDEINELQSSLAEELVSESC EADPAEQALALQSTLTVLAERMSTIRM
KASGKRQLLEEK*
>P1;1S35_SR9
structure:1S35_SR9
--GFQEFQKDAKQAEAILSNOEYTLAHLEPPDSLEAAEAGIRKFEDFLGS
MENNDRKVLSPVDS-GNKLVA----EGNLYSDKIKEKVQLIEDRHRKNNE
KAQEASVLLRDN*

>P1;NESPRIN-1_SR55
sequence:NESPRIN-1_SR55
RQSIHLEQKLYDGVSATSTWLDDVEERL---FVATALLPEETETCLFNQE
ILAKDIKEMSEEMDKNKNLFSQAFPENGDNRDVIE-----DTLGCL
LGRSLLLDSVVNQARCHQMKERLQOILNF*
>P1;1QUU_SR3
structure:1QUU_SR3
ETIDQLHLEFAKRAAPFNNWMEGAMEDLQDMFIVHSI--EEIQSLITAHE
QFKATLPEADGERQSIMAIQNEVEKV--IQSYNIRISSNPYSTVTMDEL
RTKWDRKVKQLVPIRDQSLQEELARQHAN*

>P1;NESPRIN-1_SR56
sequence:NESPRIN-1_SR56
LNFQNDLKVLF TSLADNKYIILQKLANVFEQPVAEQIEAIOQAEDGLKEF
DAGIIEELKRRGDELQVEQPSMQE-----LSKLQDMYDELMMI I
GSRRSGLNQNLTLKS*
>P1;1HCI_SR4
structure:1HCI_SR4
-HANERLRRQFAAQANAIGPWIONKMEEIARSSIQITGALEDQMNQLKQY
EHNIINYKNNIDKLEGDHQLIQEALVFDNKHTNYTMEHIRVGWELLLTTI
ARTINEVETQILTRD*
```



**Figure S12A:** Alignments used to build the models of nesprin-1 SRs

```
>P1;NESPRIN-1_SR57
sequence:NESPRIN-1_SR57
NQNLTLKSQYERALQDLADLLETGQEKMAGDQKIIVSSKEEIQOPLDKHK
EYFQGLESHMILTVTLFRKIIISFAVQKETQF-----HTELMASAVLKRA
HVRGVELEYILETWSH-----*
>P1;1QUU_SR3
structure:1QUU_SR3
ETIDQLHLEFAKRAAPFNNWMEGAMEDLQ--DMFIVHSIEEIQSLITAHE
QFKATLPEADGERQSIMAIQNEVEKVIQSYNIRISSNPYSTVTMDELRT
KWDKVKQLVPIRDQSLQEELARQHAN*

>P1;NESPRIN-1_SR58
sequence:NESPRIN-1_SR58
---SHLDEDQOELSRQLEV-VESSIPSVGLVEENEDR-LIDRITLYQHLK
SSLNEYQPKLYQVLDGKRLLISISCSDESQ--LNQLGECWLSNTNKMS
KELHRLETIL-----*
>P1;1HCI_SR4
structure:1HCI_SR4
HANERLRRQFAAQANAIGPWIQNKMEEIARSSIQITGALEDQMNQLKQYE
HNIINYKNNIDKLEGDHQLIQEALVFDNKHTNYTMEHIRVWELLTTIA
RTINEVETQILTRD*

>P1;NESPRIN-1_SR59
sequence:NESPRIN-1_SR59
KH-WTRYQSEADLIHWLQSAKDRLEFWTQOSVTVPOELEMVRDHLNAFL
EFSKEVDAQSSSLKSSVLSTGNQLLRLKQVDTATLRSELSRIDSQWTDLLT
NIPAVQEKHLHQLQMD*
>P1;1S35_SR9
structure:1S35_SR9
--GFQEFQKDAQAEAILSNQEYTLAHLEPPD-----SLEAAEAGIRKFE
DFLGSMMENNRDKVLSVPVDSGNKLVAEGNLYSDKIKEKVQLIEDRHRKNE
KAQEASVLLRDN---*
>P1;1U5P_SR15
structure:1U5P_SR15
ANKQONFNTGIKDFDFWLSEVEALLASEDYGK-----DLASVNNLLKKHQ
LLEADISAHEDRLKDLNSQADSLMTSSAFDTSQVKDKRETINGRFORIKS
MAAARRAKLNESHRL*

>P1;NESPRIN-1_SR60
sequence:NESPRIN-1_SR60
HQLQMDKLP SRHAISEVMSWTSMLMENAIQKDEDNIKNSIGYKAIHEYLOK
YKGFKIDINCKQLTVDFVNQSVLQISSQDVESKRSDKTDFAEQLGAMNKS
WQILOQLVTEKIQLLEGLLESWS*
>P1;1HCI_SR4
structure:1HCI_SR4
HANERLRRQFAAQANAIGPWIQNKMEEIA--RSSIQITGALEDQMNQLKQ
YEHNII--NYKNNIDKLEGDHQLIQEALVFDN---KHTNYT--MEHIRVG
WELLTTIARTINEVETQILTRD*
```

**Figure S12A:** Alignments used to build the models of nesprin-1 SRs

```
>P1;NESPRIN-1_SR61
sequence:NESPRIN-1_SR61
LESWSEYENNVQCLKTWFETQEKRLKQQHRIGDQASVQNALKDCQDLEDL
IKAKDKEVEKIEQONGLALIQTKKEDVSSIVMSTLRELQGTWANLDHMGVQ
LKILLKSVLDQ*
>P1;1S35_SR9
structure:1S35_SR9
--GFQEFQKDAKQAEAILSNOEYTLAHLEPPDSLEAAEAGIRKFEDFLGS
MENNDRDKVLSPVDSGNKLVAEENL-YSDKIKEKVQLIEDRHRKNNKAQE
ASVLLRDN---*
>P1;1U5P_SR15
structure:1U5P_SR15
ANKQONFNTGIKDFDFWLSEVEALLASEDYGKDLASVNNLLKKHQLLEAD
ISAHEDRLKDLNSQADSLMTSSAF-DTSQVKDKRETINGRFQRIKSMAAA
RRAKLNESHRL*
```

```
>P1;NESPRIN-1_SR62
sequence:NESPRIN-1_SR62
LDQWSSHKVAFDKINSYLMEARYSLSRFRLLTGSLEAVQVQVDNLQNLQD
DLEKQERSLQKFGSITNQLLKECHPPVTETLTNTLKEVNMRWNNLLEEIA
EQLQSSKALLQLWQR*
>P1;1S35_SR9
structure:1S35_SR9
--GFQEFQKDAKQAEAILSNOEYTLAHLE-PPDSLEAAEAGIRKFEDFLG
SMENNDRDKVLSPVDSGNKLVAE-GNLYSDKIKEKVQLIEDRHRKNNKAQ
EASVLLRDN-----*
>P1;1U5P_SR15
structure:1U5P_SR15
ANKQONFNTGIKDFDFWLSEVEALLASED-YGKDLASVNNLLKKHQLLEA
DISAHEDRLKDLNSQADSLMTS-SAFDTSQVKDKRETINGRFQRIKSMAA
ARRAKLNESHRL---*
```

```
>P1;NESPRIN-1_SR63
sequence:NESPRIN-1_SR63
LQLWQRYKDYSKQCASTVQQQEDRTNELLKAATNKDIADDEVATWIQDCN
DLLKGLGTVKDSLFLVHELGEQLKQVDASAASAIQSDQLSLSQHLCALE
QALCKQQTSLQAGVLD*
>P1;1S35_SR9
structure:1S35_SR9
-----GFQEFQKDAKQAEAILSNOEYTLAHLEPPDSL--EAAEAGIRKFE
DFLGSMENNDRDKVLSPVDSGNKLVAE-GNLYSDKIKEKVQLIEDRHRKNN
EKAQEASVLLRDN---*
>P1;1U5P_SR15
structure:1U5P_SR15
---ANKQONFNTGIKDFDFWLSEVEALLASEDYGKDL--ASVNNLLKKHQ
LLEADISAHEDRLKDLNSQADSLMTS-SAFDTSQVKDKRETINGRFQRIK
SMAAARRAKLNESHRL*
```

**Figure S12A:** Alignments used to build the models of nesprin-1 SRs

```
>P1;NESPRIN-1_SR64
sequence:NESPRIN-1_SR64
VLDYETFAKSLEALEAWIVEAEEILQGQDPSSHSDLSTIQERMEELKGQM
LKFSSMAPDLDRNLNELGYRLPL-----NDKEIKRMQNLNRHWSLISSQTT
ERFSKLSQSF*
>P1;1S35_SR9
structure:1S35_SR9
--GFQEFQKDAKQAEAILSNOEYTLAHLE--PPDSLEAAEAGIRKFEDFL
GSMENNRDKVLSPVDSGNKLVAEGNLYSDKIKEKVQLIEDRHRKNNEKAQ
EASVLLRDN*

>P1;NESPRIN-1_SR65
sequence:NESPRIN-1_SR65
LLOHQTFLEKCEWMEFLVQTEQKLAVEISG-NYQHLLLEQORAHELFQAE
MFSRQOILHSIIIDGQRLLLEQGQVDDRDEFNLKLTLLSNQWQGVIRRAQQ
RRGIIDSQ*
>P1;1S35_SR9
structure:1S35_SR9
--GFQEFQKDAKQAEAILSNOEYTLAHLEPPDSLEAAEAGIRKFEDFLGS
MENNRDKVLSPVDSGNKLVAEGNL-YSDKIKEKVQLIEDRHRKNNEKAQE
ASVLLRDN*

>P1;NESPRIN-1_SR66
sequence:NESPRIN-1_SR66
DSQIRQWQRYREMAEKLKRWLVEVSYLPMSGGLGSVPIPLQ-QARTLFDEV
QFKEKVFLRQOGSYILTVEAGKQLLLSADSGAEAAALQAE LAEIQEKWKS A
SMRLEEQKKKLAFLLKDW-*
>P1;1HCI_SR4
structure:1HCI_SR4
HANERLRRQFAAQANAIGPWIQNKMEEIAR----SSIQITGALEDQMNQL
KQYEHNIINYKNNIDKLEGDHQLIQEAL-VFDNKHTNYTMEHIRVGVWELL
LTTIARTINEVETQILTRD*

>P1;NESPRIN-1_SR67
sequence:NESPRIN-1_SR67
LKDWEKCEKGIADSLEKLRTFKKLSQS-LPDHHEELHAEQMRCKELENA
VGSWTDDLTLQLSLLKDTLSAYISADDISILNERVELLQROWEELCHQLSL
RRQOIGERLNE*
>P1;1S35_SR9
structure:1S35_SR9
--GFQEFQKDAKQAEAILSNOEYTLAHLEPPDSLEAAEAGIRKFEDFLGS
MENNRDKVLSPVDSGNKLVAE-GNLYSDKIKEKVQLIEDRHRKNNEKAQE
ASVLLRDN---*
>P1;1U5P_SR15
structure:1U5P_SR15
ANKQONFNTGIKDFDFWLSEVEALLASEDYGKDLASVNNLLKKHQLLEAD
ISAHEDRLKDLNSQADSLMTS-SAFDTSQVKDKRETINGRFQRIKSMAAA
RRAKLNESHRL*
```

**Figure S12A:** Alignments used to build the models of nesprin-1 SRs

```
>P1;NESPRIN-1_SR68
sequence:NESPRIN-1_SR68
VFSEKNKELCEWLTQMESKVSQN--GDILIEEMIEKLLKDYQEEIATAQE
NKIQLQQMGERLAKASHESKASEIEYKLGKVNDRWQHLLDLIAARVKKLK
ETLVAV*
>P1;3EDV_SR15
structure:3EDV_SR15
KFYHDAKEIFGRIQDKHKKLPEELGRDQNTVETLQRMHTTFFEHDIQALGT
QVRQLQEDAAARLQAAYAGDKADDIQKRENEVLEAWKSLLDACESRRVRLV
DTGDKF*

>P1;NESPRIN-1_SR69
sequence:NESPRIN-1_SR69
LVAVQQLDKNMSSLRTWLAHIESELAKPIVYDSCNSEEIQRKLNEQQELQ
RDIEKHSTGVASVLNLCEVLLHDCDACATDAECDSIQQATRNLDRRWRNI
CAMSMERRLKIEET*
>P1;1S35_SR9
structure:1S35_SR9
--GFQEFQKDAKQAEAILSNOEYTLAHLEPPD--SLEAAEAGIRKFEDFL
GSMENNRDKVLSPVDSGNKLVAE-----GNLYSDKIKEKVQLIEDRHRKN
NEKAQEASVLLRDN*

>P1;NESPRIN-1_S70
sequence:NESPRIN-1_SR70
-----WRLWQKFLDDYSRFEDWLKSSERTAAFPSSSGVIYTVAKEEL
KKFEAFQR----QVHECLTQLELINKQYRRLARENRTDS-ACSLKQMVHE
GNQRWDNLQKRVTSILRRLKHF-----*
>P1;1HCI_SR4
structure:1HCI_SR4
-----HANERLRRQFAAQANAIGPWIQNKMEEIARS----S-IQITGALE
DQMNQLKQY-EHNIINYKNNIDKLEGDHQLIQEALVFD--NKHTNYTMEH
IRVGWELLLTTIARTINEVETQILTRD*
>P1;1HCI_SR1
structure:1HCI_SR1
SSAVNQENERLMEEYERLASELLEWIRRTIPWLENRTPEKT-MQAMQKKL
EDFRDYRRKHKPPKVQEKCLEINFNTLQTKLRISNRPAFMPSEGKMOVSD
IAGAWQRLEQAEKGYEEWLLNEIR-RL*
```

**Figure S12A:** Alignments used to build the models of nesprin-1 SRs

```
>P1;NESPRIN-1_S71
sequence:NESPRIN-1_SR71
---IGQ-----REEFETARDSILVWLTEMDLQLTNIE-HFSECDVQAKIK
QLKAFQQ----EISLNHNKIEQIIAQGEQLIEKSE-----PLDAAIIEEE
LDELRRYCQEVFGRVERYHKKLIRLPLP*
>P1;1HCI_SR4
structure:1HCI_SR4
-----HANERLRRQFAAQANAIGPWIQNKMEEIARS-----SIQITGALED
OMNQLKQY-EHNIINYKNNIDKLEGDHQLIQEALVFD--NKHTNYTMEHI
RVGWELLLTTIARTINEVETQILTRD--*
>P1;1HCI_SR1
structure:1HCI_SR1
SSAVNQENERLMEEYERLASELLEWIRRTIPWLENRTPEKTMQAMQKKLE
DFRDYRRKHKPPKVQEKQLEINFNTLQTKLRISNRPAFMPSEGKMVSDI
AGAWORLEQAEKGYEEWLLNEIR-RL--*

>P1;NESPRIN-1_SR72
sequence:NESPRIN-1_SR72
S---SALESQIRQLGKALDD-SRFQIQQTENIIRSKTPTGPELDTSYKGYM
KLLGECSSSIDSVKRLEHKLKEEEESLPGFVNLHSTETQTAGVIDRWELL
QAQALSKELRMKQNLQKW-*
>P1;1HCI_SR4
structure:1HCI_SR4
HANERLRRQFAAQANAIGPWIQNKMEEIARSSIQITGALEDOMNQLKQYE
HNIINYKNNIDKLEGDHQLIQEALVFDNKHTNYT-----MEHIRVGWELL
LTTIARTINEVETQILTRD*

>P1;NESPRIN-1_SR73
sequence:NESPRIN-1_SR73
LQKWQFNSDLNSIWAWLGDTEEELEQLQRLLELSTDIQTIELQIKKLKEL
QKAVDHRKAIILSINLCSPEFTQADSKESTRDLQDRLSQMNGRWDRVCSLL
EEWRGLLQDA*
>P1;1S35_SR9
structure:1S35_SR9
--GFQEFQKDAQAEAILSNQEYTLAHL---EPPDSLEAAEAGIRKFEDEF
LGSMENNRDKVLSVPVDSGNKLVAEGNLYSDKIKEKVQLIEDRHRKNEKA
QEASVLLRDN*

>P1;NESPRIN-1_SR74
sequence:NESPRIN-1_SR74
---LMQCQGFHEMASHGLLLMLENIDRRKNEIVPIDSNLDAE-ILQDHHKQ
LMQIKHELLESQLRVASLQDMSCQLLVNAEGTDCLEAKEKVHVIGNRLKL
LLKEVSRHIKELEKLLDVSS*
>P1;1HCI_SR4
structure:1HCI_SR4
HANERLRRQFAAQANAIGPWIQNKMEEIARS-----SIQITGALEDQMNO
LKQYEHNIINYKNNIDKLEGDHQLIQEALV-FDNKHTNYTMEHIRVGWEL
LLTTIARTINEVETQILTRD*
```

**Figure S12B:** Alignments used to build the models of nesprin-2 SRs

**A**

```
>P1;NESPRIN2_SR1
sequence:NESPRIN2_SR1
-----GKVKDAMGWLTLOKEKLOKLL----KDSEN
DTYFKKYNSLLSFM-----ESFNEEKKSFLDVLSIKR-DLDELDDKDL
QLREAWDGLDHQINAWKIKLNYALPPP-*
>P1;1HCI_SR4
structure:1HCI_SR4
-HANERLR-----QFAAQANAIGPWIONKMEEIARS-----SIQIT
GALEDQMNQLKQYEHNI INYKNNIDKLEGDHQLIQEALVFDNKHTNYTME
HIRVWELLTITIARTINEVETQILTRD*
>P1;3EDV_SR14
structure:3EDV_SR14
--SHMRHRL-----FQLNREVDLEQWIAEREVAVAGSHELQD-DYEHV
TMLQERFREFARDTGNI--GQERVDTVNHLADELINSGHSDAATIAEWKD
GLNEAWADLLELIDTRTQILAASYELH-*
>P1;1QUU_SR2
structure:1QUU_SR2
GSSNEIRRLERLEHLAEKFRQKASTHETWAYGKEQILLQKDYESASLTEV
RALLRKHEAFESDLAA---HQDRVEQIAAIAQELNELDYHDAVNVNDRQCQ
KICDQWDRLGTLTQKRREALERMEKLL-*

>P1;NESPRIN2_SR2
sequence:NESPRIN2_SR2
-----AWKIKLNYALPPPLHQTEAWLQEV EELMDEDLSASQDHSQA
VTLIQEKMTLTKSLMDRFEHHSNILLTFENKDENHLP-----L
VPPNKLEEMKRRINNILEKKFILLLE-----*
>P1;1QUU_SR2
structure:1QUU_SR2
GSSNEIRRLERLEHLAEKFRQKASTHETWAYGKEQILLQKDYESASLTEV
RALLRKHEAFESDLAAHQDRVEQIAAIAQELNELDYHDAVNV-----N
DRCQKICDQWDRLGTLTQKRREALERMEKLL---*
>P1;1QUU_SR3
structure:1QUU_SR3
-----ETIDQLHLEFAKRAAPFNNWMEGAMEDL-QDMFIVHSIEEI
QSLITAHEQFKATLPEADGERQSIMAIQNEVEKVIQSYNIRISSNPYST
VTMDELRTKWVKVQLVPIRQSLQEEELARQHAN*
```

**Figure S12B:** Alignments used to build the models of nesprin-2 SRs

```
>P1;NESPRIN2_SR3
sequence:NESPRIN2_SR3
-----ILEKKFILLEFHYYKCLVGLVDEVKSKLDIWNIKYGS--
RESVELLLEDWHKFI EEKEFLARLDTSFQKCGE IYKNLA-----
----GECQNINKQYMMVKSDVCMYRKNIYNVKSTLQKV*
>P1;1QUU_SR2
structure:1QUU_SR2
-GSSNEIRRLERLEHLAE--KFRQKAST-HETWAYGKEQILLQKDYESAS
LTEVRALLRKHEAFESDLAAHQDRVEQIAAIAQELNELDYHDAVNV----
---NDRCQKICDQWDRLGTLTQKRREALERMEKLL---*
>P1;1QUU_SR3
structure:1QUU_SR3
-----ETIDQLHL--EFAKRAAP-FNNWMEGAMEDL-QDMFIVHS
IEEIQSLITAHEQFKATLPEADGERQSIMAIQNEVEKVIQSYNIRISSN
PYSTVTMDLRTKWVKQLVPIRDSLQEEELARQHAN*

>P1;NESPRIN2_SR4
sequence:NESPRIN2_SR4
-----NVKSTLQKVLACWATYVENLRLLRA----CFEET
KKEEIKVFPFET-LAQW---NLEHATLNEAGNFLVEVSNDVVGSSISKEL
RRLNKRWRKLVSKTQLMNLPLMIKKQDQ-*
>P1;1HCI_SR4
structure:1HCI_SR4
-HANERLRR-----QFAAQANAIGPWIQNKMEEIARS-----SIQIT
GALEDQMNQLKQYEHNI INYKNNIDKLEGDHQLIQEA-LVFDNKHTNYTM
EHIRVGWELLLTTIARTINEVETQILTRD*
>P1;3EDV_SR14
structure:3EDV_SR14
SHMRHRL
--SHMRHRL-----FQLNREVDLEQWIAEREVVAGSHELQD-DYEHV
TMLQERFREFARDTGNII--GOERVDTVNHLADELINS-GHSDAATIAEWK
DGLNEAWADLLELIDTRTQILAASYELH-*
>P1;1QUU_SR2
structure:1QUU_SR2
GSSNEIRRLERLEHLAEKFRQKASTHETWAYGKEQILLQKDYESASLTEV
RALLRKHEAFESDLAA---HQDRVEQIAAIAQELNEL-DYHDAVNVNDRC
QKICDQWDRLGTLTQKRREALERMEKLL-*

>P1;NESPRIN2_SR5
sequence:NESPRIN2_SR5
-----VAKDVEKLIQVEIWEAEAKSVLDQDDVD---TSMEESLKHLIAK
GSMFDELMARSEDMLQMDIQNISSQ-----ESFQHVLTTGLQAK
IQEAKEKVQINVVKL-*
>P1;1HCI_SR4
structure:1HCI_SR4
HANERLRRQFAAQANAIGPWIQNKMEEIARSSI-QITGALEDQMNQLKQY
EHNIINY-KNNIDKLEGDHQLIQEALVFDNKHTNYTMEHIRVGWELLLTT
IARTINEVETQILTRD*
>P1;3EDV_SR14
structure:3EDV_SR14
SHMRHRLFQLNREVDLEQWIAEREVVAGSHELQDYEHVTMLQERFREF
ARDTGNIGQERVDTVNHLADELINSGHSDAATIAEWKDGLNEAWADLLEL
IDTRTQILAASYELH-*
```

**Figure S12B:** Alignments used to build the models of nesprin-2 SRs

```
>P1;NESPRIN2_SR6
sequence:NESPRIN2_SR6
DVSPDLDIRLKMEEESQKELESYMMRAOQLLGORE-----SPGELISKHK
EALIIISN---TKSLAKYLKAVEELKNNVTEDIKMSLEEKSRDVC AKWESL
HHELSLYVQQLKIDIEKG-*
>P1;1HCI_SR4
structure:1HCI_SR4
--HANERLRRQFAAQANAIGPWIQNMEEIARSSI-QITGALEDQMNQLK
QYEHNIINY-KNNIDKLEGDHQLIQEA-LVFDNKHTNYTMEHIRVGVWELL
LTTIARTINEVETQILTRD*
>P1;3EDV_SR14
structure:3EDV_SR14
--SHMRHRLFQLNREVD DLEQWIAEREVVAGSHELGDYEHVTMLQERFR
EFARDTGNIGQERVDTVNHLADELINS-GHSDAATIAEWKDGLNEAWADL
LELIDTRTQILAASYELH-*

>P1;NESPRIN2_SR7
sequence:NESPRIN2_SR7
-----LSLYVQQLKIDIEKGKLSDNILKLEKQINKEKKLIR-----RGRT
KGLIKEHEACFSEEGCLYQLNHHMEVLRELCEELP--SQKSQOEVKRLK
DYEQKIERLLKCASEI-----*
>P1;1QUU_SR2
structure:1QUU_SR2
GSSNEIRRLERLEHLAEKFRQKASTHETWAYGKEQILLOKDYESASL TEV
RALLRKHEAFESDLAAHQDRVEQIAAIAQELNELDYHDAVNVNDR CQKIC
DQWDR LGTLTQKRREALERMEKLL*

>P1;NESPRIN2_SR8
sequence:NESPRIN2_SR8
-----TYRDILEHHLQNNKFRITSDFSSEEDRSSSCLQAKLTD
LQVIKNETDARWKEFEIISLKEN-----HVNDIKKPFVIKERDTLKER
ERELQMTLNT-----*
>P1;3EDV_SR16
structure:3EDV_SR16
-----RFFSMVRDLMLWMEDVIRQIEAQEKPRDVSSVELLMNNHQG
IKAEIDARND SFTTCIELGKSL LARKHYASEEIKEKLLQLTEKRKEMIDK
WEDRW EWLRL-----*
>P1;3FB2_SR15
structure:3FB2_SR15
HSHDSDLQRFLSDFRDLMSWINGIRGLVSSDELAKDVTGAEALLERHQE
HRTEIDARAGTFQAFEQFGQQLLAHGHYASPEIKQKLDILDQERADLEKA
WVQRRMMLDQCLELQ*

>P1;NESPRIN2_SR9
sequence:NESPRIN2_SR9
-----NIQDSIAKQIEICNR-----LEEPGNFVLK-ELHPFD
LHAMQNIILKYKTQFEG-----MNHVRQ RSEDTLKALEDFLASLRTA
KLSAEP----*
>P1;1U5P_SR15
structure:1U5P_SR15
ANKQQNFNTGIKDFDFWLSEVEALLASEDYGKDLASVNNLLK KKHQLLEAD
ISAHEDRLKDLNSQADSLMTSSAFDTSQVKDKRETINGRFQRIKSMAAAR
RAKL NESHRL*
```



**Figure S12B:** Alignments used to build the models of nesprin-2 SRs

```
>P1;NESPRIN2_SR10
sequence:NESPRIN2_SR10
RSEDTLKALEDFLASLRTAKL-SAEPVTDLSASDTQVAQENTLTVKNKEG
EIHL-MKDKAKHLDKCLKMLDMSFKDAE----RGDDTSCENLLDAFSI--
KLSETHGYGVQEEFTEEN*
>P1;1HCI_SR4
structure:1HCI_SR4
--HANERLRRQFAAQANAIGPWIQNKMEEIARSSI-QITGALEDQMNQLK
QYEHNIINY-KNNIDKLEGDHQLIQEALVFDNKHTNYTMEHIRVGVWELL
TTIARTINEVETQILTRD*
>P1;3EDV_SR14
structure:3EDV_SR14
--SHMRHRLFQLNREVDDLEQWIAEREVVAGSHELGDYEHVTMLQERFR
EFARDTGNIGQERVDTVNHLADELINSGHSDAATIAEWKDGLNEAWADLL
ELIDTRTQILAASYELH-*

>P1;NESPRIN2_SR11
sequence:NESPRIN2_SR11
EFTEENKLLLEACIFKNNELLKNIQDVQSQISKIGLKDPTVPAVKHRKKS
IRLDKVLDEY-EEEKRHLQEMANSLPHFKDGREKTVNQOCQNTVVLWENT
KALVTECLEQCGRVLELLK-*
>P1;1HCI_SR4
structure:1HCI_SR4
--HANERLRRQFAAQANAIGPWIQNKMEEIARSSIQI--TGALEDQMNQL
KQYEHNIINY-KNNIDKLEGDHQLIQEALVFDNKHTNYTMEHIRVGVWELL
LTTIARTINEVETQI-LTRD*
>P1;3EDV_SR14
structure:3EDV_SR14
--SHMRHRLFQLNREVDDLEQWIAEREVVAGSHELGO-DYEHVTMLQERF
REFARDTGNIGQERVDTVNHLADELINSGHSDAATIAEWKDGLNEAWADL
LELIDTRTQILAASYELH--*

>P1;NESPRIN2_SR12
sequence:NESPRIN2_SR12
ECLEQCGRVLELLKQYQNFKSILTTLIQKEESVISLQASYMGKENLKKRI
AEIEIVKEE-FNEHLEVVDKINQVCKNLQFYLNMKMTFE-EPPFEKEANI
IVDRWLDINEKTEDYENLGRALALWD*
>P1;1HCI_SR4
structure:1HCI_SR4
-----HANERLRRQFAAQANAIGPWIQNKMEEIARS----SIQITGALE
DQMNQLKQY-EHNIINYKNNIDKLEGDHQLIQEALVFD--NKHTNYTMEH
IRVGVWELLTTIARTINEVETQILTRD*
>P1;1HCI_SR1
structure:1HCI_SR1
-SSAVNQENERLMEEYERLASELLEWIRRTIPWLENRTPEKTMQAMQK
EDFRDYRRKHKPKVQEKQLEINFNTLQTKLRISNRPAFMPSEGMVSD
IAGAWQRLEQAEGYEEWLLNEIR-RL*
```

**Figure S12B:** Alignments used to build the models of nesprin-2 SRs

```
>P1;NESPRIN2_SR13
sequence:NESPRIN2_SR13
YYENLGRALALWDKLFLNKNVIDEWTEKALQKMELHQLTEE-DRERLKEE
LQVHEQKTSEFSRRVAEIQFLLQSSEIPELELQ-----VMESSILNKMEHV
QKCLTGESNCHALSGSTAELR--*
>P1;1HCI_SR4
structure:1HCI_SR4
-----HANERLRRQFAAQANAIGPWIQNKMEEIARSSIQITGALEDQMNO
LKQYEHNIINYKNNIDKLEGDHQLIQEALVFDNKHTNYTMEHIRVGVWELL
LTTI--ARTINEV--ETQILTRD*

>P1;NESPRIN2_SR14
sequence:NESPRIN2_SR14
-----NCHALSGSTAELREDLDQAKTQIGMTESLLK-----ALSPS
DSL----EIF-TKLEEIQQOILQOKHSMILLENQ----IGCLTPELSELK
KQYESVSDLFNTKKSVLQDHF SKLLND*
>P1;1QUU_SR2
structure:1QUU_SR2
GSSNEIRRLERLEHLAEKFRQKASTHETWAYGKEQILLQKDYESASLTEV
RALLRKHEAFESDLAAHQDRVEQIAAIAQELNELDYHDAVNVNDRQCQIC
DQWDRLGTLTQKRREALERM-EKLL--*

>P1;NESPRIN2_SR15
sequence:NESPRIN2_SR15
VLQDHF SKLLNDQCKNFNDWFSNIKVNK--ECFESSETKKSVEQKLOKL
SDFLTLEGRNSKIKQVDSVLKHVKKHLPKAHV KELISWLVGQEFEEKME
SICQARAKELED SLQQL*
>P1;3EDU_SR14
structure:3EDU_SR14
----GSLFQLKRETDDLEQWISEKELVASSPEMGQDFDHVTLLRDKFRDF
ARETGAIG-QERVDNVNAFIERLIDA-GHSEAATIAEWKDG L NEMWADLL
ELIDTRMQLLAASYDLH*
>P1;3EDV_SR14
structure:3EDV_SR14
SHMRHRLFQLNREVD DLEQWIAEREVVAGSHELQDYEHVTMLQERFREF
ARDTGNIG-QERVDTVNHLADELINS-GHSDAATIAEWKDG L NEMWADLL
ELIDTRTQILAASYELH*

>P1;NESPRIN2_SR16
sequence:NESPRIN2_SR16
-----EDSLQQLLRLQDDHRNLRKWL TNQEEKWKGMEEPGEKTELF CQ
ALAR-KREQFESVAQLNNSLKEYGFTEEEEIIMEATCLMDRYQTLLRQLS
EIEEEDKLLPTEDQS*
>P1;3EDU_SR14
structure:3EDU_SR14
----GSLFQLKRETDDLEQWISEKELVASSPEMGQDFDHVTLLRDKFRDF
ARETGAIGQERVDNVNAFIERLIDAGHSEAATIAEWKDG L NEMWADLLEL
IDTRMQLLAASYDLH*
>P1;3EDV_SR14
structure:3EDV_SR14
SHMRHRLFQLNREVD DLEQWIAEREVVAGSHELQDYEHVTMLQERFREF
ARDTGNIGQERVDTVNHLADELINS GHSDAATIAEWKDG L NEMWADLLEL
IDTRTQILAASYELH*
```

**Figure S12B:** Alignments used to build the models of nesprin-2 SRs

```
>P1;NESPRIN2_SR17
sequence:NESPRIN2_SR17
KLLPTEDQSFNDLAHDVHVIHWIKEIKESLMVLNSSEGKMPLEERIQKIKEI
ILLKPEGDARIETIMKQAESSEAPLV-----QKTLTDISNQWDNTLHLA
STYLSHQEKLLLEGEKYL*
>P1;1HCI_SR4
structure:1HCI_SR4
HANERLRROFAAQANAIGPWIQNKMEEIARS-SIQITGALEDQMNQLKQY
EHNIINYKNNIDKLEGDHQLIQEALVFDNKHTNYTMEHIRVWELLTTI
ARTINEVETQILTRD---*

>P1;NESPRIN2_SR18
sequence:NESPRIN2_SR18
YLSHQEKLLLEG----EKYLQSKEDLRLMLIELKKKQEAGFALQHGLOEK
KAQLKIYKKFLKKAQD---LTSLLKELKSQGNYLLECTK-NPSFSEEPWL
EIKHLHESLLQQLQDSVQNLGDGHVREHD*
>P1;1HCI_SR4
structure:1HCI_SR4
-HANERLRR-----QFAAQANAIGPWIQNKMEEIARS-----SIQIT
GALEDQMNQLKQYEHNIINYKNNIDKLEGDHQLIQEALVFDNKHTNYTME
HIRVWELLTTIARTINEVETQILTRD*
>P1;3EDV_SR14
structure:3EDV_SR14
--SHMRHRL-----FQLNREVDLEQWIAEREVVAGSHELGO-DYEHV
TMLQERFREFARDTGNII--GOERVDTVNHLADELINSGHSDAATIAEWKD
GLNEAWADLLELIDTRTQILAASYELH-*
>P1;1QUU_SR2
structure:1QUU_SR2
GSSNEIRRLERLEHLAEKFRQKASTHETWAYGKEQILLQKDYESASLTEV
RALLRKHEAFESDLAA---HQDRVEQIAAIAQELNELDYHDAVNVNDRCQ
KICDQWDRLGTLTQKRREALERMEKLL-*

>P1;NESPRIN2_SR19
sequence:NESPRIN2_SR19
-LDGHVREHDSYQVCVTDLNTTLDNFSKEFVVSFSDKPVQIAVEEKLQKL
QELENRLSLQDGTLLKILALAKSVKQNTSSVGQKIIKDDIKSLQCKQKDL
ENRLASAKQEMECCCLNS-*
>P1;3EDV_SR16
structure:3EDV_SR16
-----RFFSMVRDLMLWMEDVIRQIEAQ-EKPRDVSSVELLMNNH
QGIKAEIDARNDSTTCIELGKSLARK-HYASEEIKEKLLQLTEKRKEM
IDKWEDRWEWLRL-----*
>P1;3FB2_SR15
structure:3FB2_SR15
HS-HDSHDLQRFLSDFRDLMSWINGIRGLVSSD-ELAKDVTGAEALLERH
QHRTEIDARAGTFQAFEQFGQQLLAHGHI-ASPEIKQKLDILDQERADL
EKAWVQRRMMLDQCLELQ*
>P1;1S35_SR8
structure:1S35_SR8
-----EQAFLOQLDDFQAWLSITQKAVASE-DMPELPEAEQLLQQH
AGIKDEIDGHQDSYQRVKESGEKVIQGTDPPEYLLLGQRLEGLDTGWDAL
GRMWESRSHTLAQCL---*
```

**Figure S12B:** Alignments used to build the models of nesprin-2 SRs

```
>P1;NESPRIN2_SR20
sequence:NESPRIN2_SR20
---DERKVNELQNOQPLELDTMLRNEQ----LEEIEKLYTQLEAKKAAIKP
LEQTECLNKTETGALVLH----NIGYSAQHLDNLLQALITLKKNKESQYC
VLRDFQ*
>P1;1S35_SR8
structure:1S35_SR8
EQAFLOLDLDDFQAWLSITQKAVASEDMPESLPEAEQLLOQHAGIKDEIDG
HQDSYQRVKESGEKVIQGGQTDPEYLLLGQRLEGLDTGWDALGRMWESRSH
TLAQCL*

>P1;NESPRIN2_SR21
sequence:NESPRIN2_SR21
NKESQYCVLRDFQEYLAIVESMKALLTDKESLKV-GPLD-SVTYLDKIK
KFIASIEKEKDSLGNLKIKNENLSNHVTDMDKKLLESQIKQLEHGWEQVE
QQIQKKYSQQVVEYDEFTT*
>P1;1HCI_SR4
structure:1HCI_SR4
--HANERLRRQFAAQANAIGPWIQNKMEEIARSSI-QITGALEDQMNQLK
QYEHNIINYKNNIDKLEGDHQLIQEAL-VFDNKHTNYTMEHIRVGVWELL
TTIARTINEVETQILTRD-*
>P1;3EDV_SR14
structure:3EDV_SR14
--SHMRHRLFQLNREVDDLEQWIAEREVVAGSHELGDYEHVTMLQERFR
EFARDTGNIGQERVDTVNHLADELINSGHSDAATIAEWKDGLNEAWADLL
ELIDTRTQILAASYELH--*

>P1;NESPRIN2_SR22
sequence:NESPRIN2_SR22
QVVEYDEFTTLMNKVQDTEISLQQQQOHLQLRLKSPEERAGNQSMIALTT
DLQATKHGFSVLKQAELOMKRIWGEKEK-----KNLEDGINNLKKQWE
TLEPLHLEAENQIKKCDIRN-*
>P1;1HCI_SR4
structure:1HCI_SR4
-HANERLRRQFAAQANAIGPWIQNKMEEIARS-SI-QITG---ALEDQMN
QLKQYEHNIINY-KNNIDKLEGDHQLIQEALVFDNKHTNYTMEHIRVGE
LLTTIARTINEVETQILTRD*
>P1;3EDV_SR14
structure:3EDV_SR14
-SHMRHRLFQLNREVDDLEQWIAEREVVAGSH-ELGDYE---HVTMLQE
RFREFARDTGNIGQERVDTVNHLADELINSGHSDAATIAEWKDGLNEAWA
DLELIDTRTQILAASYELH-*
```

**Figure S12B:** Alignments used to build the models of nesprin-2 SRs

```
>P1;NESPRIN2_SR23
sequence:NESPRIN2_SR23
PLHLEAENQIKKCDIRNKMKETILWAKNLLGELN-PSIPLLPDDILSQIR
KCKVTHDGILA-RQQSVESLAEVVKDKVPSLTTYEGSDLNNTLEDLRNQY
QMLVLKSTQRSQQLEFKLEER-*
>P1;1HCI_SR4
structure:1HCI_SR4
----HANERLRR-QFAAQANAIGPWIQNKMEEIARSSI-QITGALEDQMN
QLKQYEHNIIN-YKNNIDKLEGDHQLIQEA-LVFDNKHTNYTMEHIRVWG
ELLLTTIARTINEVETQILTRD*
>P1;3EDV_SR14
structure:3EDV_SR14
-----SHMRHRLFQLNREVDLDLEQWIAEREVVAGSHELGDYEHVTMLQE
RFREFARDTGNIGQERVDTVNHLELINS-GHSDAATIAEWKDGLEAW
ADLLELIDTRTQILAASYELH-*

>P1;NESPRIN2_SR24
sequence:NESPRIN2_SR24
---KLEERSNFFAIIRKFQLMVQESETLIIPRVETA---ATEAE---LKH
HHVTLEAS-QKELQEIDSGISTHLQELTNIYEELNVFE-RLFLEDQLKNL
KIRTNRIQRFIQNTCNEVEHKIKFCR-*
>P1;1HCI_SR4
structure:1HCI_SR4
-----HANERLRRQFAAQANAIGPWIQNKMEEIARS----SIQITGALED
QMNQLKQY-EHNIINYKNNIDKLEGDHQLIQEALVFD--NKHTNYTMEHI
RVGWELLLTTIARTINEVETQILT-RD*
>P1;1HCI_SR1
structure:1HCI_SR1
SSAVNQENERLMEEYERLASELLEWIRRTIPWLENRTPEKTMQAMQKKLE
DFRDYRRKHKPPKQVQEKQLEINFNTLQTKLRISNRPAFMPSEGKMVSDI
AGAWQRLEQAEGYEEWLLNEIR--RL*

>P1;NESPRIN2_SR25
sequence:NESPRIN2_SR25
CNEVEHKIKFCRQFHEKTSALQEEADSIQRNELLLNQEVNKGVKKEIYNL
KDRLTAIKCCILQVLKLVKVFQDYIGLN-----WDFSQ-----DQLQ
TQVFEKEKELEEKIKQLD*
>P1;1HCI_SR4
structure:1HCI_SR4
HANERLRRQFAAQANAIGPWIQNKMEEIAR----SSIQITGALEDQMNQL
KQYEHNIINYKNNIDKLEGDHQLIQEALVFDNKHTNYTMEHIRVGWELLL
TTIARTINEVETQILTRD*
```

**Figure S12B:** Alignments used to build the models of nesprin-2 SRs

```
>P1;NESPRIN2_SR26
sequence:NESPRIN2_SR26
QLDTFEEEHGKYQALLSKMRA-IDLQIKKMTEVVVKAPDSSPESRRLNAQ
ILSQRIEKAKCLCDEI IKKLNENKTFDDSFKEKEILQ-IKLNAEENDKLY
KVLQNMVLELSPKELDEK*
>P1;1HCI_SR4
structure:1HCI_SR4
--HANERLRRQFAAQANAIGPWIQNKMEEIARSSI-QITGALEDQMNQLK
QYEHNIINY-KNNIDKLEGDHQLIQEALVFDNKHTNYTMEHIRVWGWELL
TTIARTINEVETQILTRD*
>P1;3EDV_SR14
structure:3EDV_SR14
--SHMRHRLFQLNREVDLDLEQWIAEREVVAGSHELGDYEHVTMLQERFR
EFARDTGNIGQERVDTVNHLADELINSGHSDAATIAEWKDGLEAWADLL
ELIDTRTQILAASYELH-*

>P1;NESPRIN2_SR27
sequence:NESPRIN2_SR27
ELSPKELDEKNCQDKLETSLSHLVNLQIKSQLOQPLLINLEIKHIQNEKDNC
EAFQEQVWA-EMCSIKAVTAIEKQREENSS-EASDVETKLREFEDLQMQL
NTSIDLRTNVLNDAYENLT*
>P1;1HCI_SR4
structure:1HCI_SR4
--HANERLRRQFAAQANAIGPWIQNKMEEIAR-SSI-QITGALEDQMNQL
KQYEHNIINY-KNNIDKLEGDHQLIQEALVFDNKHTNYTMEHIRVWGWELL
LTTIARTINEVETQILTRD*
>P1;3EDV_SR14
structure:3EDV_SR14
--SHMRHRLFQLNREVDLDLEQWIAEREVVAGS-HELGDYEHVTMLQERF
REFARDTGNIGQERVDTVNHLADELINSGHSDAATIAEWKDGLEAWADL
LELIDTRTQILAASYELH-*

>P1;NESPRIN2_SR28
sequence:NESPRIN2_SR28
NVLNDAYENLTRYKEAVTRAVESITSLEAIIIPYRVDV-----GNPEES
LEMPLRKQEELESTVAHIQDLTEKLGMISSPEAKLQLOQY-----
--TLQELVSKNSAMKEAFKAQETEAERYLENYKCY*
>P1;1QUU_SR2
structure:1QUU_SR2
-GSSNEIRRLERLEHLAEKFRQKASTHETWAYGKEQILLQKDYESASLTE
VRALLRKHEAFESDLAAHQDRVEQIAAIAQELNELDYHDAVNV-----
NDRCQKICDQWDRLGTLTQKRREALERMEKLL---*
>P1;1QUU_SR3
structure:1QUU_SR3
-----ETIDQLHLEFAKRAAPFNNWMEGAMEDL-QDMFIVHSIEE
IQSLITAHEQFKATLPEADGERQSIMAIQNEVEKVIQSYNIRISSNPYS
TVTMDLRTKWDKVKQLVPIRDQSLQEELARQHAN*
```

**Figure S12B:** Alignments used to build the models of nesprin-2 SRs

```
>P1;NESPRIN2_SR29
sequence:NESPRIN2_SR29
EAERYLENYKCYRKMEEDIYTNLSKMETVLGQSMSSLPLSYREALERLEQ
SKALVSNLIST-KEELMKLRQILRLLRLRCTENDGICLLKIVSALWEKWL
SLEAAKEWEMWCEELKQEWK*
>P1;1HCI_SR4
structure:1HCI_SR4
--HANERLRRQFAAQANAIGPWIQNKMEEIARSSI-Q--ITGALEDQMNQ
LKQYEHNIINY-KNNIDKLEGDHQLIQEA-LVFDNKHTNYTMEHIRVGWE
LLLTTIARTINEVETQILTRD*
>P1;3EDV_SR14
structure:3EDV_SR14
--SHMRHRLFQLNREVDDLEQWIAEREVVAGSHELGO--DYEHVTMLQER
FREFARDTGNIGQERVDTVNHLADELINS-GHSDAATIAEWKDGLNEAWA
DLELELIDTRTQILAASYELH-*

>P1;NESPRIN2_SR30
sequence:NESPRIN2_SR30
-ELKQEWKVFVSEEIHEREAIILDNLQEELPEISKTKAATTEELSELLDCL
COYGENVEKQQLLLTLLLQIRRSIQNVPESSGAVETVPAFQEITSMKERC
NKLLQKVQKNKELVQTEIQERHSFTKE*
>P1;1HCI_SR4
structure:1HCI_SR4
HANERLRRQFAAQANAIGPWIQNKMEEIARSSI-QITGALEDQMNQLKQY
EHNIINY-KNN--IDKLEGDHQLIQEALVFDNK----HTNYTMEHIRVGW
ELLLTTIARTINEVETQILTRD-----*
>P1;3EDV_SR14
structure:3EDV_SR14
SHMRHRLFQLNREVDDLEQWIAEREVVAGSHELGOQDYEHVTMLQERFREF
ARDTGNIGQER--VDTVNHLADELINSGHSDAA-----TIAEWKDGLNEAW
ADLELELIDTRTQILAASYELH-----*

>P1;NESPRIN2_SR31
sequence:NESPRIN2_SR31
NKELVQTEIQERHSFTKEIIALKNFFQOTTTTSFQNM-AFQDHPEKSEQFE
ELQSILKKGKLTFFENIMEKLRIRYSEMY--TIVPAE--IESQVEECKERKAL
EDIDEKISNEVLKSSPSY-----*
>P1;1HCI_SR1
structure:1HCI_SR1
SSAVNQENERLMEEYERLASELLEWIRRTIPWLENRTPEKTMQAMQKLE
DFRDYRRKHKPPKVQEKQLEINFNTLQTKLRISNRPAFMPSEGKMVSDI
AGAWQRLEQAEGYEEWLLNEIRRL*
```

**Figure S12B:** Alignments used to build the models of nesprin-2 SRs

```
>P1;NESPRIN2_SR32
sequence:NESPRIN2_SR32
-LKSSPSYAMRRKIEEINNGLHNVEKMLQOKS-----KNIEKAQEIQKQM
WDELDLW-HSKLNELDSEVQDIVEQDPGQAQEWMDNLMIPFQOYQOVSQR
AECRTSQLNKATVKME*
>P1;1HCI_SR4
structure:1HCI_SR4
HANERLRRQFAAQANAIGPWIQNKMEEIARSSI-QITGALEDQMNQLKQY
EHNIINY-KNNIDKLEGDHQLIQEALVFDNKHTNYTMEHIRVGVWELLLTT
IARTINEVETQILTRD*
>P1;3EDV_SR14
structure:3EDV_SR14
SHMRHRLFQLNREVDLDLEQWIAEREVVAGSHELGDYEHVTMLQERFREF
ARDTGNIGQERVDVTVNHLADELINSGHSDAATIAEWKDGLEAWADLLEL
IDTRTQILAASYELH-*
```

```
>P1;NESPRIN2_SR33
sequence:NESPRIN2_SR33
SQLNKATVKMEEYSDLLKSTEAWIENTSHLLANP---ADYDSLRTLSHHA
STVQMALEDSEQKHLLHSIFMDLEDLSIIFETDE--LTQSIQELSNQVT
ALQOKIMESLPQIQRMADDVV*
>P1;1HCI_SR4
structure:1HCI_SR4
---HANERLRRQFAAQANAIGPWIQNKMEEI-AR---SSIQITGALEDQM
NQLKQYEHNIINYKNNIDKLEGDHQLIQEALVFDNKHTNYTMEHIRVGVW
ELLLTTIARTINEVETQILTRD*
>P1;3EDV_SR14
structure:3EDV_SR14
---SHMRHRLFQLNREVDLDLEQWIAEREVVAGSHELGDYEHVTMLQERF
REFARDTGNIGQ--ERVDVTVNHLADELINSGHSDAATIAEWKDGLEAWA
DLELIDTRTQILAASYELH-*
```

```
>P1;NESPRIN2_SR34
sequence:NESPRIN2_SR34
-SLPQIQRM-ADDVVAIESEVKSMKRVSKIKTILLSKEIFDFSPEEHLK
HGEVILENIRPMKKTIAEIVSYQVELRL--PQTGMKPLPVFORNTNQLLQD
IKLLENVTQEQN----*
>P1;1HCI_SR4
structure:1HCI_SR4
HANERLRRQFAAQANAIGPWIQNKMEEIARSSIQIT-GALED-QMNQLKQ
YEHNIINYKNNIDKLEGDHQLIQEALVFDNKHTNYTMEHIRVGVWELLLTT
IARTINEVETQILTRD*
```



**Figure S12B:** Alignments used to build the models of nesprin-2 SRs

```
>P1;NESPRIN2_SR35
sequence:NESPRIN2_SR35
-----QNELLKVVVIKQTNEQDEEIEENLKQILNNYSAQFSLEHMSPDQ
ADKLPQLQGEIERM-EKQILSLNQRKEDL-----LVDLKATVNLNHQ
HLKQEQEGVERDRLPAV*
>P1;1HCI_SR4
structure:1HCI_SR4
HANERLRRQFAAQANAIGPWIQNKMEEIARSSI-QITGAL-EDQMNQLKQ
YEHNIIINY-KNNIDKLEGDHQLIQEALVFDNKHTNYTMEHIRVWELLLT
TIARTINEVETQILTRD*
>P1;3EDV_SR14
structure:3EDV_SR14
SHMRHRLFQLNREVDDLEQWIAEREVVAGSHELGDYEHV-TMLQERFRE
FARDTGNIGQERVDTVNHLADELINSGHSDAATIAEWKDGLNEAWADLLE
LIDTRTQILAASYELH-*

>P1;NESPRIN2_SR36
sequence:NESPRIN2_SR36
--KTRPEPTEVLHACKTQVAELELWLQOANVAVEPET--LNADMQQVLEQ
QLVGCQA----MLTEIEHKVAFLLLETCKDQGLGDNGA-----TQHEAEAL
SLKLTQVKNLQKVMMLQEKHSEDQHPTILKK*
>P1;1HCI_SR4
structure:1HCI_SR4
-----HANERLRRQFAAQANAIGPWIQNKMEEIARS-----SIQITGALED
QMNQLKQY-EHNIIINYKNNIDKLEGDHQLIQEALVFD--NKHTNYTMEHI
RVGWELLLTTIARTINEVETQILTRD-----*
>P1;1HCI_SR1
structure:1HCI_SR1
SSAVNQENERLMEEYERLASELLEWIRRTIPWLENRTPEKTMQAMQKKLE
DFRDYRRKHKPPKVQEKQLEINFNTLQTKLRISNRPAFMPSEGKMVSDI
AGAWQRLEQAEGYEEWLLNEIR-RL-----*

>P1;NESPRIN2_SR37
sequence:NESPRIN2_SR37
NMTEEAYINLDDKFLFELFTLSQCLSSVEEMLEMPRL--YREDGSGQQVH
YETLALAKKLYLALSDDKGDLLKAMTWPGE-NTNLLLECFDNLQVCLEH
TQAAAVCRSKSLKAGLDYNR*
>P1;1HCI_SR4
structure:1HCI_SR4
----HANERLRRQFAAQANAIGPWIQNKMEEIARSSI-QITGALEDQMNQ
LKQYEHNIINY-KNNIDKLEGDHQLIQEALVFDNKHTNYTMEHIRVWEL
LLTTIARTINEVETQILTRD*
>P1;3EDV_SR14
structure:3EDV_SR14
----SHMRHRLFQLNREVDDLEQWIAEREVVAGSHELGDYEHVTMLQER
FREFARDTGNIGQERVDTVNHLADELINSGHSDAATIAEWKDGLNEAWAD
LLELIDTRTQILAASYELH-*
```

**Figure S12B:** Alignments used to build the models of nesprin-2 SRs

```
>P1;NESPRIN2_SR38
sequence:NESPRIN2_SR38
----NEIKRLYHQLIKSKTSLQQLNEIS-----GQSVAEQLQKADAY
TVELEN-AESRVAKLRDEGERLHLP-YALLQEVYKLEDVLDMSWGMRLAR
YTELSSSFVTE----*
>P1;3EDU_SR14
structure:3EDU_SR14
----GSLFQLKRETDLEQWISEKELVASSPEMGQDFDHVTLLRDKFRDF
ARETGAIGQERVDNVNAFIERLIDAGHSEAAATIAEWKDGLNEMWADLLEL
IDTRMQLLAASYDLH*
>P1;3EDV_SR14
structure:3EDV_SR14
SHMRHRLFQLNREVDLEQWIAEREVVAGSHELQDYEHVTMLQERFREF
ARDTGNIGQERVDTVNHLADELINSGHSDAATIAEWKDGLNEAWADLLEL
IDTRTQILAASYELH*

>P1;NESPRIN2_SR39
sequence:NESPRIN2_SR39
TELSSSFVTESQQDALLQGMVELVKIGKEKLAHGHLKQTKSKVALQAQIE
NHKVFFQKLVADMILLIQAYSakilPSL-----LQIRETFWAEQVTEVKI
LEEKPRQCGMKLQSLQKW*
>P1;1U5P_SR15
structure:1U5P_SR15
-----ANKQONFNTGIKDFDFWLSEVEALLASED--YGRDLASVNNLLK
KHQLLEADISAHEDRLKDLNSQADSLMTSSAFDTSQVKDKRETINGRFQR
IKSMAAARRAKLNESHRL-*
>P1;1U5P_SR16
structure:1U5P_SR16
-----HQFFRDMDDEESWIKEKLLVSSSED--YGRDLTGVQNLRK
KHKRLEAELAAHEPAIQGVLDTGKKLSDDNTIGKEEQORLAQFVDHWKE
LKQLAAARGQRLE-----*
>P1;1CUN_SR16
structure:1CUN_SR16
-----MVHQFFRDMDDEESWIKEKLLVSSSED--YGRDLTGVQNLRK
KHKRLEAELAAHEPAIQSVLDTGKKLSDDNTIGKEEQORLAQFVDHWKE
LKQLAAARGQRLEESLEYQ*

>P1;NESPRIN2_SR40
sequence:NESPRIN2_SR40
QKWEFDENYASLEKDLEI-LISTLPSVSLVEETEER-LVERISFYQQIK
RNIGGKHARLYQTLNEGKQLVASVSCPELEGQ--IAKLEEQWLSLNKKID
HELHRLQALL----*
>P1;1HCI_SR4
structure:1HCI_SR4
HANERLRRQFAAQANAIGPWIQNKMEEIARSSIQITGALEDQMNQLKQYE
HNIINYKNNIDKLEGDHQLIQEALVFDNKHTNYTMEHIRVGVWELLTTIA
RTINEVETQILTRD*
```

**Figure S12B:** Alignments used to build the models of nesprin-2 SRs

```
>P1;NESPRIN2_SR41
sequence:NESPRIN2_SR41
----KHLLSYNRDSQDLTKWLESSQHTLNYWKEQSLNVSQDLDTIRSNIN
NFFFEFSKEVDE-KSSLKTAVISIGNQLLHLKETDTATLRASLAQFEQKWT
MLITQLPDIQEKLHQMQEK*
>P1;3EDU_SR14
structure:3EDU_SR14
----GSLFQLKRETDLEQWIEKELVASS-----PEMGQDFDHVTLLRD
KFRDFARETGAIGQERVDNVNAFIERLIDAGHSEAATIAEWKDGLENEMWA
DLELIDTRMQLLAASYDLH*
>P1;3EDV_SR14
structure:3EDV_SR14
SHMRHRLFQLNREVDLEQWIAEREVAVGS-----HELGDYEHVTMLQE
RFREFARDTGNIGQERVDTVNHLADELINSGHSDAATIAEWKDGLEAWA
DLELIDTRTQILAASYELH*

>P1;NESPRIN2_SR42
sequence:NESPRIN2_SR42
-----HQLQMEKLPKRKAITEMISWMNNVEHQTSDEDSVHSPSSAS
QVKHLLQKHKEFRMEMDYKQWIVDFVNQSLQLSTCDVESKRYERTE---
FAEHLGEMNRQWHRVHGMLNRKIQHLDQLLESITE-*
>P1;1QUU_SR2
structure:1QUU_SR2
GSSNEIRRLERLEHLAEKFRQKASTHETWAYGKEQILLOKDYESAS--LT
EVRALLRKHEAFESDLAAHQDRVEQIAAIAQELNELDYHDAVNV-----
-NDRCQKICDQWDRLGTLTQKRREALERMEKLL---*
>P1;1QUU_SR3
structure:1QUU_SR3
-----ETIDQLHLEFAKRAAPFNNWMEGAMEDL-QDMFIVHS--IE
EIQSLITAHEQFKATLPEADGERQSIMAIQNEVEKVIQSYNIRISSNPY
STVTMDLRTKWVKQLVPIRDQSLQEELARQHAN*

>P1;NESPRIN2_SR43
sequence:NESPRIN2_SR43
LDQLLESIT--ESENKIQILNNWLEAQEERLKTLOKPESVISVQKLLLDLDC
QDIENQLAIKSKALDELKQSYLTLESGAVP-LLEDTASRIDELFQKRSSV
LTQVNQLKTSMQSVLQEW*
>P1;3EDV_SR16
structure:3EDV_SR16
-----RFFSMVRDLMLWMEVDVIRQIEAQEKPRDVSSVELLMNNH
QGIKAEIDARNDSTTCIELGKSLARKHY-ASEEIKEKLLQLTEKRKEM
IDKWEDRWEWLRL-----*
>P1;3FB2_SR15
structure:3FB2_SR15
--HSHDSDLQRFLSDFRDLMSWINGIRGLVSSDELAKDVTGAEALLERH
QEHRTEIDARAGTFQAFEQFGQQLLAHGHI-ASPEIKQKLDILDQERADL
EKAWVQRRMMLDQCLELQ*
>P1;1S35_SR8
structure:1S35_SR8
-----EQAFLOLDLDFQAWLSITQKAVASEDMPELPEAEQLLQQH
AGIKDEIDGHQDSYQRVKESGEKVIQGTDPYLLLGQRLEGLDTGWDAL
GRMWESRSHTLAQCL---*
```

**Figure S12B:** Alignments used to build the models of nesprin-2 SRs

```
>P1;NESPRIN2_SR44
sequence:NESPRIN2_SR44
QLKTSMQSVLQEWKIYDQLYDEVNMMTIRFWYCMESKPVVLSLETLRQ
VENLQSLQDEAES-SEGSWKLEQEVIGKLGKLCPSVAEIIIEKQCQNTHKR
WTQVNOAIADQLQKAQSLQLWK*
>P1;1HCI_SR4
structure:1HCI_SR4
-----HANERLRRQFAAQANAIGPWIQNKMEEIARSS-I-QITGALEDQ
MNQLKQYEHNIINY-KNNIDKLEGDHQLIQEALVFDNKHTNYTMEHIRVG
WELLLTTIARTINEVETQILTRD*
>P1;3EDV_SR14
structure:3EDV_SR14
-----SHMRHRLFQLNREVDDLEQWIAEREVVGASHE-LGQDYEHVTML
QERFREFARDTGNIGQERVDTVNHLADELINSGHSDAATIAEWKDGLENEA
WADLLELIDTRTQILAASYELH-*

>P1;NESPRIN2_SR45
sequence:NESPRIN2_SR45
--NAHGEEAARLKQQE-AKFQQLANISMSGNNL---AEILPPALQDIKEL
QHDVQKT-KEAFLQNSSVLDRLPQPAESSTHMLLPGLHSLQRA-AYLEK
MLLVKANEFEF-----*
>P1;1HCI_SR4
structure:1HCI_SR4
HANERLRRQFAAQANAIGPWIQNKMEEIARSSI-QITGALEDQMNQLKQY
EHNIINY-KNNIDKLEGDHQLIQEALVFDNKHT-NYTMEHIRVGVWELLLT
TIARTINEVETQILTRD*
>P1;3EDV_SR14
structure:3EDV_SR14
SHMRHRLFQLNREVDDLEQWIAEREVVGASHELQDYEHVTMLQERFREF
ARDTGNIGQERVDTVNHLADELINSGHSDAATI-AEWKDGLENEAWADLLE
LIDTRTQILAASYELH-*

>P1;NESPRIN2_SR46
sequence:NESPRIN2_SR46
-----KANEFEFVLSQFQDFGVRLESLKGLIMHEEENLDRLHQ-QEKENP
DSFLNHVLAALTAQSPDIEHLNEVSLKLPLS-----DVAVKTLQNMNRQWI
RATATALERCSELQIGLNEK*
>P1;1HCI_SR4
structure:1HCI_SR4
-----HANERLRRQFAAQANAIGPWIQNKMEEIARSSI-QITGALEDQMN
QLKQYEHNIINY-KNNIDKLEGDHQLIQEALVFDNKHTNYTMEHIRVGVGWE
LLTTTIARTINEVETQILTRD*
>P1;3EDV_SR14
structure:3EDV_SR14
-----SHMRHRLFQLNREVDDLEQWIAEREVVGASHELQDYEHVTMLQE
RFREFARDTGNIGQERVDTVNHLADELINSGHSDAATIAEWKDGLENEAWA
DLELIDTRTQILAASYELH-*
```

**Figure S12B:** Alignments used to build the models of nesprin-2 SRs

```
>P1;NESPRIN2_SR47
sequence:NESPRIN2_SR47
-QGIGLNEKFLYCCFKWIQLLEKIEEALK-VDVANSLPELLEQOKTYKML
EAEVSINQAIADSYVTQSLQLLDTTEIENRPEFITEFSKLTDRWQNAVQG
VRQRKGDVD-----*
>P1;1HCI_SR4
structure:1HCI_SR4
HANERLRRQFAAQANAIGPWIQNKMEEIARSSI-QITGALEDQMNQLKQY
EHNIINY-KNNIDKLEGDHQLIQEALVFDNKHTNYTMEHIRVWGWELLLTT
IARTINEVETQILTRD*
>P1;3EDV_SR14
structure:3EDV_SR14
SHMRHRLFQLNREVDLDLEQWIAEREVVAGSHELGDYEHVTMLQERFREF
ARDTGNIGQERVDVTNHLADELINSGHSDAATIAEWKDGLEAWADLLEL
IDTRTQILAASYELH-*

>P1;NESPRIN2_SR48
sequence:NESPRIN2_SR48
-----FTTSVENLFRFLTDTSHELLSAVRGQERFSLYQTRSLIHEL
KNKEIHFORRRTTTCALTEAGEKLLLTDLTKTESVGRRI SQLQDSWKDM
EPQLAEMIKQFQSTVETW*
>P1;3EDV_SR16
structure:3EDV_SR16
-----RFFSMVRDLMLWMEDVIRQIEAQ--EKPRDVSSVELLMNNH
QGIKAEIDARNDSTTCIELGKSL LARKHY-ASEEIKEKLLQLTEKRKEM
IDKWEDRWELRL-----*
>P1;3FB2_SR15
structure:3FB2_SR15
HSHDSDLQRFSLDFRDLMSWINGIRGLVSSD--ELAKDVTGAEALLERH
QEHRTEIDARAGTFQAFEQFGQQLLAHGHI-ASPEIKQKLDILDQERADL
EKAWVQRRMMLDQCLELQ*
>P1;1S35_SR8
structure:1S35_SR8
-----EQAFQLDLDLDFQAWLSITQKAVASE--DMPESLPEAEQLLQOH
AGIKDEIDGHQDSYQVRKESGEKVIQGTDP EYLLLGQRLEGLDTGWDAL
GRMWESRSHTLAQCL---*

>P1;NESPRIN2_SR49
sequence:NESPRIN2_SR49
EMIKQFQSTVETWDQCEKKIKE-LKSRLQVLKAQSEDPLPELHEDLHNEK
ELIKELEQSLASWTQNLKELQTMKADLTRHVLVEDVMVLKEQIEHLHRQW
EDLCLRVAIRKQEI EDRLNTWV*
>P1;1HCI_SR4
structure:1HCI_SR4
---HANERLRRQFAAQANAIGPWIQNKMEEIARSS----IQITGALEDQM
NQLKQYEHNIINYKNNIDKLEGDHQLIQEAL-VFDNKHTNYTMEHIRVWG
ELLLTTIARTINEVETQILTRD*
>P1;3EDV_SR14
structure:3EDV_SR14
---SHMRHRLFQLNREVDLDLEQWIAEREVVAGSHELGDYEHVTMLQERF
REFARDTGNIGQ--ERVDVTNHLADELINSG-HSDAATIAEWKDGLEAW
ADLLELIDTRTQILAASYELH-*
```

**Figure S12B:** Alignments used to build the models of nesprin-2 SRs

```
>P1;NESPRIN2_SR50
sequence:NESPRIN2_SR50
RKQEIEDRLNTWVVFNEKKNELCAWLQVOMENKVLQATADI-SIEEM--IEK
LQKDCME----EINLFSENKQLQKQMGDQLIKASNKSR-AAEIDDKLNKI
NDRWQHLLFDVIGSRVKKLKETFAFIQ*
>P1;1HCI_SR4
structure:1HCI_SR4
-----HANERLRRQFAAQANAIGPWIQNKMEEIARS-----SIQITGALED
QMNQLKQY-EHNIINYKNNIDKLEGDHQLIQEALVFD--NKHTNYTMEHI
RVGWELLLTTIARTINEVETQILTRD*
>P1;1HCI_SR1
structure:1HCI_SR1
SSAVNQENERLMEEYERLASELLEWIRRTIPWLENRTPEKTMQAMQKKLE
DFRDYRRKHKPPKVQEKQLEINFNTLQTKLRISNRPAFMPSEGKMVSDI
AGAWQRLEQAEEKGYEEWLLNEIR-RL*

>P1;NESPRIN2_SR51
sequence:NESPRIN2_SR51
KETFAFIQQLDKNMSNLRWTLARIESELSKPVVYDVCDDQEIQKRLAEQQ
DLQRDIEQ-HSAGVESVFNICDVLLHSDACANETECDTSIQOTTRSLDRR
WRNICAMSMERRMKIEETWRLW*
>P1;3EDU_SR14
structure:3EDU_SR14
----GSLFQLKRETDDLEQWISEKELVASSPEM--GQDFDHVTLLRDKFR
DFARETGAIGQERVDNVNAFIERL-----IDAGHSEAATIAEWKDGLENEM
WADLLELIDTRMQLLAASYDLH*
>P1;3EDV_SR14
structure:3EDV_SR14
SHMRHRLFQLNREVDDLEQWIAEREVVAGSHEL--GQDYEHVTMLQERFR
EFARDTGNIGQERVDTVNHLADEL-----INSGHSDAATIAEWKDGLENEA
WADLLELIDTRTQILAASYELH*

>P1;NESPRIN2_SR52
sequence:NESPRIN2_SR52
RRMKIEETWRLWQKFLDDYSRFEDWLKSAERTAACPNSSEVLYTSAKEEL
KRFEAFQR---QIHERLTQLELINKQYRRLARENRTDT-ASRLKQMVHE
GNQRWDNLQRRVTAVLRRLRHFTNQRE*
>P1;1HCI_SR4
structure:1HCI_SR4
-----HANERLRRQFAAQANAIGPWIQNKMEEIARS-----S-IQITGALE
DQMNQLKQY-EHNIINYKNNIDKLEGDHQLIQEALVFD--NKHTNYTMEH
IRVGWELLLTTIARTINEVETQILTRD*
>P1;1HCI_SR1
structure:1HCI_SR1
SSAVNQENERLMEEYERLASELLEWIRRTIPWLENRTPEKT-MQAMQKKL
EDFRDYRRKHKPPKVQEKQLEINFNTLQTKLRISNRPAFMPSEGKMVSDI
IAGAWQRLEQAEEKGYEEWLLNEIR-RL*
```

**Figure S12B:** Alignments used to build the models of nesprin-2 SRs

```
>P1;NESPRIN2_SR53
sequence:NESPRIN2_SR53
----VLRRLRHFTNQREEFEGTRESILVWLTEM DLQLTNVEHFSESDADD
KMRQLNGFQQ----EITLNTNKIDQLIVFGEQLIQKSE-----PLDAVLI
EDELEELHRYCQEVFGRVSRFHRRLTSCTPGL*
>P1;1HCI_SR4
structure:1HCI_SR4
-----HANERLRRQFAAQANAIGPWIQN---KMEEIARS----SIQITGA
LEDQMNQLKQY-EHNIINYKNNIDKLEGDHQLIQEALVFD--NKHTNYTM
EHIRVGWELLLTTIARTINEVETQILTRD----*
>P1;1HCI_SR1
structure:1HCI_SR1
SSAVNQENERLMEEYERLASELLEWIRR---TIPWLENRTPEKTMQAMQK
KLEDFRDYRRKHKPKVQEKQLEINFNTLQTKLRISNRPAFMPSEGKMV
SDIAGAWQRLEQAEKGYEELLNEIR-RL----*

>P1;NESPRIN2_SR54
sequence:NESPRIN2_SR54
-----SCPEHH--YKQMEGDRNVPPVPPASST--PYKPPYGKL
LLPPGTDGGEKGPVRLNGNPQQEDGG---LAGITEQQSGAFDRWEMIQAQ
ELHNKLIKQNLQ---*
>P1;1HCI_SR4
structure:1HCI_SR4
HANERLRRQFAAQANAIGPWIQNKMEEIARSSI-QITGALEDQMNQLKQY
EHNIINY-KNNIDKLEGDHQLIQEALVFDNKHTNYTMEHIRVGWELLLTT
IARTINEVETQILTRD*
>P1;3EDV_SR14
structure:3EDV_SR14
SHMRHRLFQLNREVDDLEQWIAEREVVAGSHELQDYEHVTMLQERFREF
ARDTGNIGQERVDTVNHLADELINSGHSDAATIAEWKDGLEAWADLLEL
IDTRTQILAASYELH-*

>P1;NESPRIN2_SR55
sequence:NESPRIN2_SR55
---KQNLQQLNSDISAITTWLKKTEAELEMLKMAKPPSDIQEI ELRVKRL
QEILKAFDT-YKALVVS VNVSSKEFLQTESPESTELOSRLRQLSLLWEAA
QGAVDSWRGGLRQSLMQC*
>P1;3EDU_SR14
structure:3EDU_SR14
----GSLFQLKRETDDLEQWISEKELVASSPE---MGQDFDHVTLLRDKF
RDFARETGAIGQERVDNVNAFIERLIDAGHSEAATIAEWKDGLEAWADL
LELIDTRMQLLAASYDLH*
>P1;3EDV_SR14
structure:3EDV_SR14
SHMRHRLFQLNREVDDLEQWIAEREVVAGSHE---LGQDYEHVTMLQERF
REFARDTGNIGQERVDTVNHLADELINSGHSDAATIAEWKDGLEAWADL
LELIDTRTQILAASYELH*
```

**Figure S12B:** Alignments used to build the models of nesprin-2 SRs

```
>P1;NESPRIN2_SR56
sequence:NESPRIN2_SR56
--GGLRQSLMQCQDFHQLSQNLLLWLASAKNRRQKAHVTDPKADPRALLE
CRRELMQL-EKELVERQPQVDMLQEISNSLLIKGHGED-CIEAEEKVHVI
EKCLKQLREQVSDLMALQGTQN---*
>P1;1HCI_SR4
structure:1HCI_SR4
-----HANERLRRQFAAQANAIGPWIQNKMEEIARS-----SIQITGALED
QMNQLKQY-EHNIINYKNNIDKLEGDHQLIQEALVFD--NKHTNYTMEHI
RVGWELLTTIARTINEVETQILTRD*
>P1;1HCI_SR1
structure:1HCI_SR1
SSAVNQENERLMEEYERLASELLEWIRRTIPWLENRTPEKTMQAMQKLE
DFRDYRRKHKPPKVQEKQLEINFNTLQTKLRISNRPAFMPSEGKMVSDI
AGAWQRLEQAEGYEEWLLNEIR-RL*
```

**Figure S12:** Alignment used to build the models of nesprin-1 (A) and nesprin-2 (B) SRs
